# Supplementary material for: Identification of Transcription Factors Regulating SARS-CoV-2 Tropism Factor Expression by Inferring Cell-Type-Specific Transcriptional Regulatory Networks in Human Lungs
Source: MDPI journal article supplement (doi:10.3390/v14040837), 2022-04-17
Supplement: s1 [file s1]

(a)

Regulatory network diagram showing transcription factors (TFs) and their target genes. The network is color-coded: red for TFs, purple for target genes, and orange for other genes. The background shows a dense network of grey lines representing other potential interactions.

Key nodes and interactions include:

- Red nodes (TFs):** NFKB1, JUNB, CUX1, BHLHE40, RUNX1, IRF1, TP53, IKZF1.
- Purple nodes (Target Genes):** NFIC, MEF2C, ELF1, ADNP, BACH1, STAT1, STAT2, TCF12, TCF7L2, FOS, RELA, EGR1, MITF, PPARG, ERG, JUN, PBX3, NR3C1, VDR, NRP1, IFITM3, IFITM1, CTSL, TMPRSS2, CD209.
- Orange nodes (Other Genes):** FURIN.

Key interactions (arrows) include:

- NFKB1 → JUNB
- NFKB1 → CUX1
- NFKB1 → BHLHE40
- NFKB1 → RUNX1
- NFKB1 → IRF1
- NFKB1 → TP53
- NFKB1 → IKZF1
- JUNB → NFKB1
- CUX1 → NFKB1
- BHLHE40 → NFKB1
- RUNX1 → NFKB1
- IRF1 → NFKB1
- TP53 → NFKB1
- IKZF1 → NFKB1
- NFIC → MEF2C
- MEF2C → NFIC
- ELF1 → MEF2C
- ADNP → MEF2C
- BACH1 → MEF2C
- STAT1 → MEF2C
- STAT2 → MEF2C
- TCF12 → MEF2C
- TCF7L2 → MEF2C
- FOS → MEF2C
- RELA → MEF2C
- EGR1 → MEF2C
- MITF → MEF2C
- PPARG → MEF2C
- ERG → MEF2C
- JUN → MEF2C
- PBX3 → MEF2C
- NR3C1 → MEF2C
- VDR → MEF2C
- NRP1 → MEF2C
- IFITM3 → MEF2C
- IFITM1 → MEF2C
- CTSL → MEF2C
- TMPRSS2 → MEF2C
- CD209 → MEF2C
- FURIN → MEF2C

**(b)**

Regulatory network diagram showing interactions between various transcription factors. The network is highly complex, with many overlapping connections. Key nodes include IRF1 (red), FOXP1 (blue), NFkB1 (purple), and STAT1 (red). The network is highly complex, with many overlapping connections.
