# Supplementary material for: Identification of Transcription Factors Regulating SARS-CoV-2 Tropism Factor Expression by Inferring Cell-Type-Specific Transcriptional Regulatory Networks in Human Lungs
Source: MDPI journal article supplement (doi:10.3390/v14040837), 2022-04-17
Supplement: s1 [file s1]



A regulatory network diagram showing interactions between transcription factors (TFs) and target genes. The TFs are represented by purple nodes on the left, and the target genes are represented by orange nodes on the right. The interactions are shown as directed edges with various symbols indicating the type of regulation.

**Transcription Factors (Left):** MAFB, STAT2, NFIC, PPARG, HIF1A, SPI1, CEBPB, IRF1, EGR1.

**Transcription Factors (Middle):** STAT1, MITF, JUN, FOS.

**Target Genes (Right):** IFITM1, IFITM3, NRP1, CTSL, ACE2, FURIN.

**Interactions:**

- MAFB → IFITM1 (inhibition, T-bar)
- STAT2 → IFITM1 (activation, arrow)
- STAT2 → IFITM3 (activation, arrow)
- STAT1 → IFITM1 (activation, arrow)
- STAT1 → IFITM3 (activation, arrow)
- STAT1 → NRP1 (activation, arrow)
- MITF → IFITM1 (activation, arrow)
- MITF → IFITM3 (activation, arrow)
- MITF → NRP1 (activation, arrow)
- MITF → CTSL (activation, arrow)
- MITF → ACE2 (activation, arrow)
- MITF → FURIN (activation, arrow)
- JUN → IFITM1 (activation, arrow)
- JUN → IFITM3 (activation, arrow)
- JUN → NRP1 (activation, arrow)
- JUN → CTSL (activation, arrow)
- JUN → ACE2 (activation, arrow)
- JUN → FURIN (activation, arrow)
- FOS → IFITM1 (activation, arrow)
- FOS → IFITM3 (activation, arrow)
- FOS → NRP1 (activation, arrow)
- FOS → CTSL (activation, arrow)
- FOS → ACE2 (activation, arrow)
- FOS → FURIN (activation, arrow)
- IRF1 → IFITM1 (activation, arrow)
- IRF1 → IFITM3 (activation, arrow)
- IRF1 → NRP1 (activation, arrow)
- IRF1 → CTSL (activation, arrow)
- IRF1 → ACE2 (activation, arrow)
- IRF1 → FURIN (activation, arrow)
- EGR1 → IFITM1 (activation, arrow)
- EGR1 → IFITM3 (activation, arrow)
- EGR1 → NRP1 (activation, arrow)
- EGR1 → CTSL (activation, arrow)
- EGR1 → ACE2 (activation, arrow)
- EGR1 → FURIN (activation, arrow)
