# Supplementary figures and images for: Identification of Transcription Factors Regulating SARS-CoV-2 Tropism Factor Expression by Inferring Cell-Type-Specific Transcriptional Regulatory Networks in Human Lungs
Source: MDPI journal article supplement (doi:10.3390/v14040837), 2022-04-17

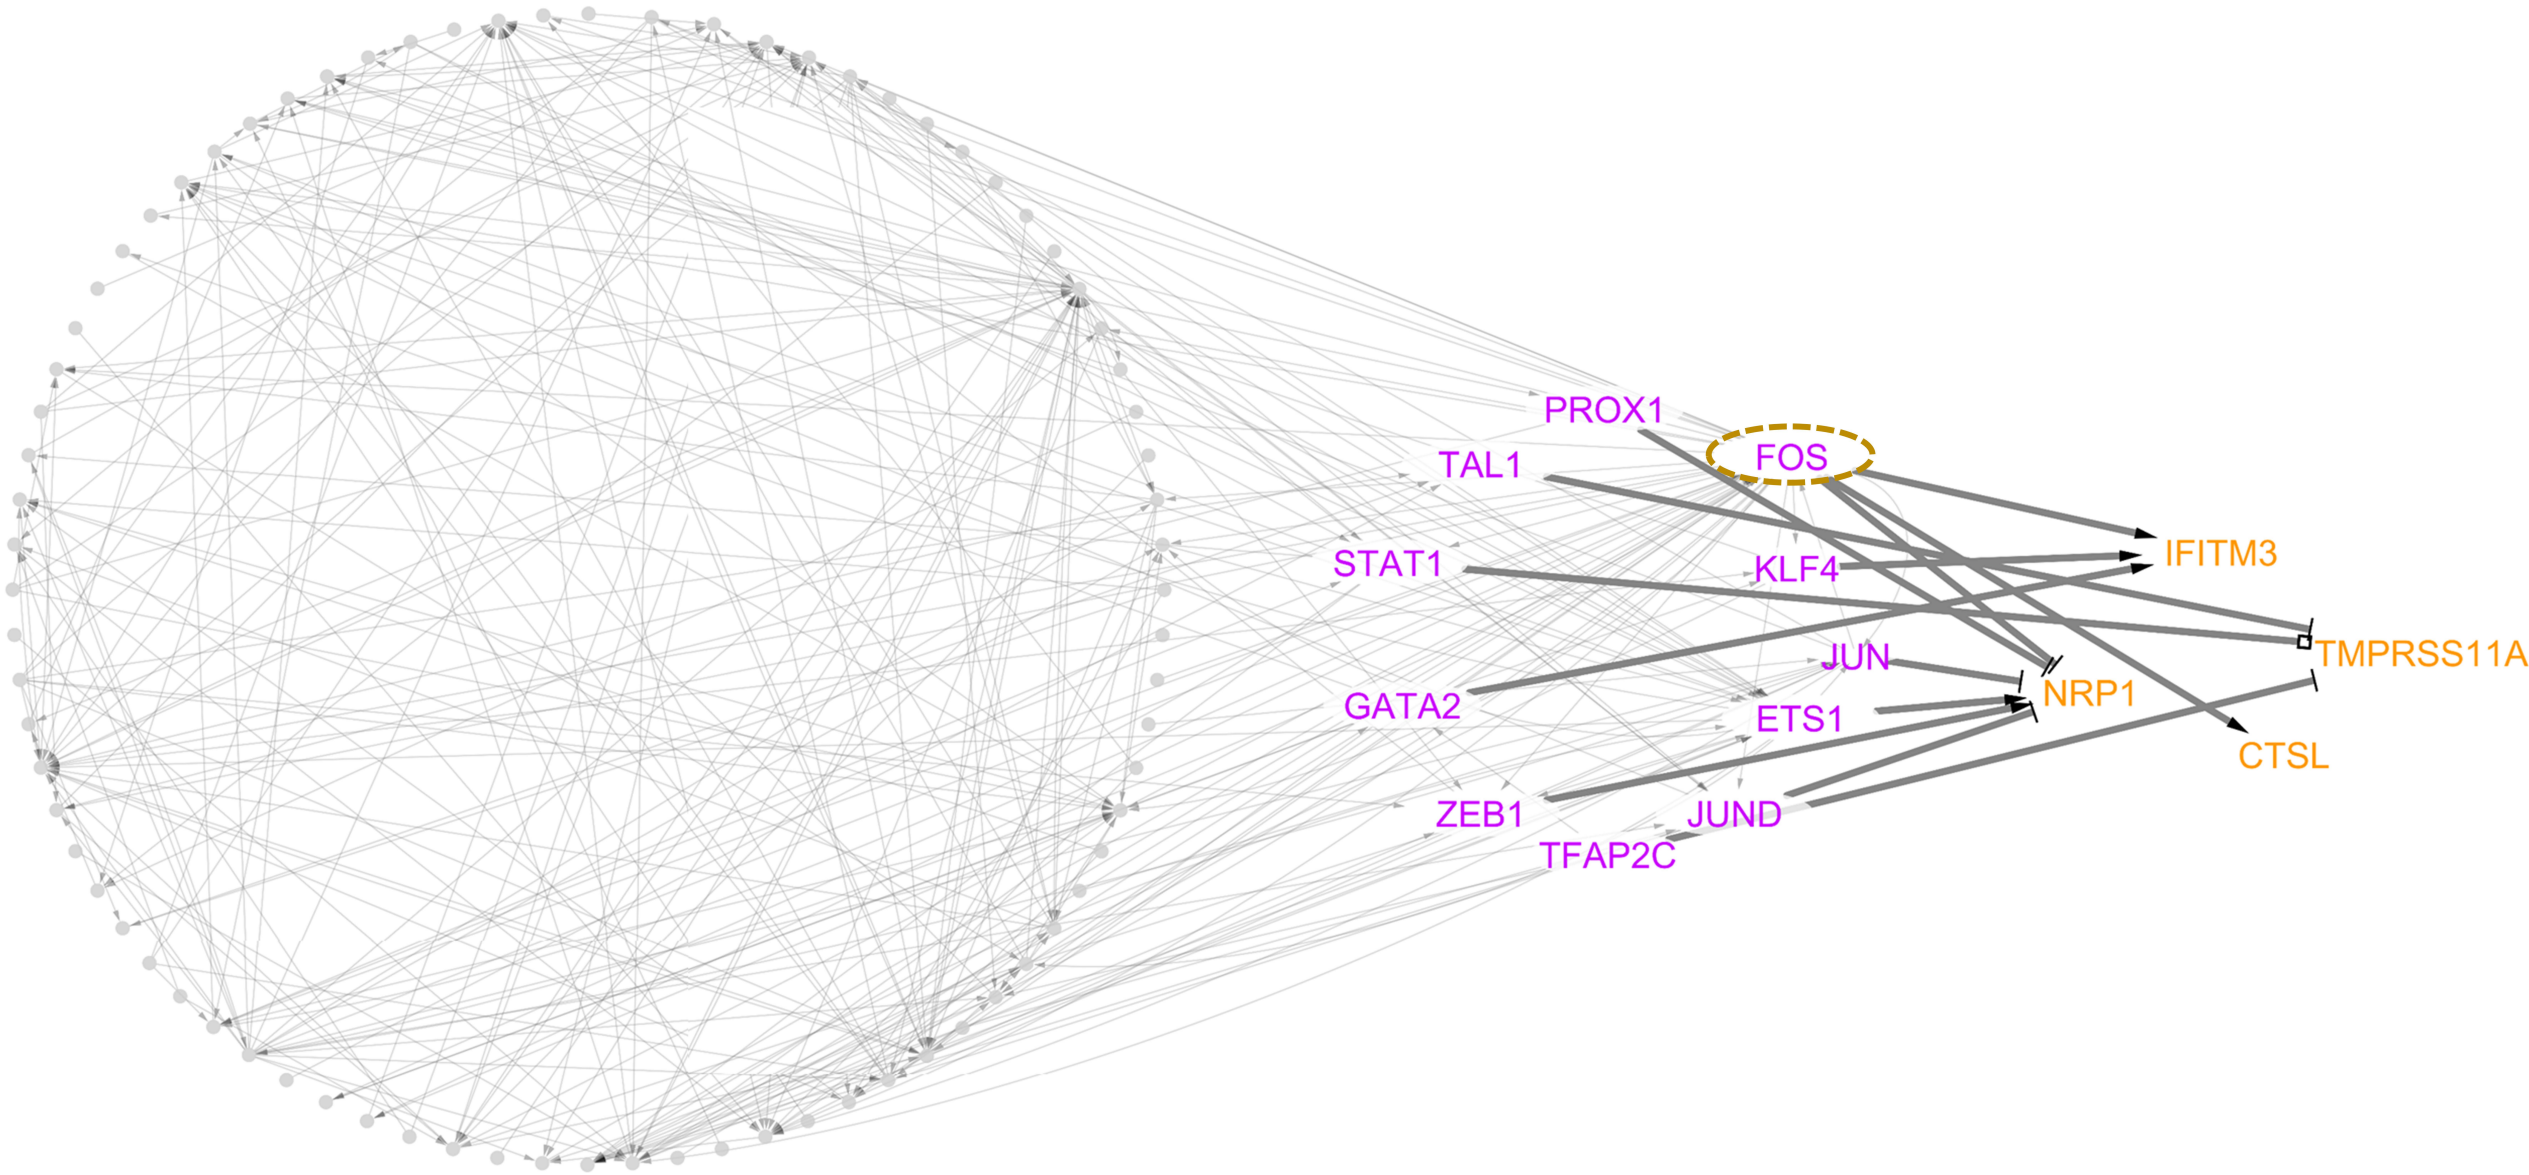

Supplement: s1 [file s1]

**(a)**

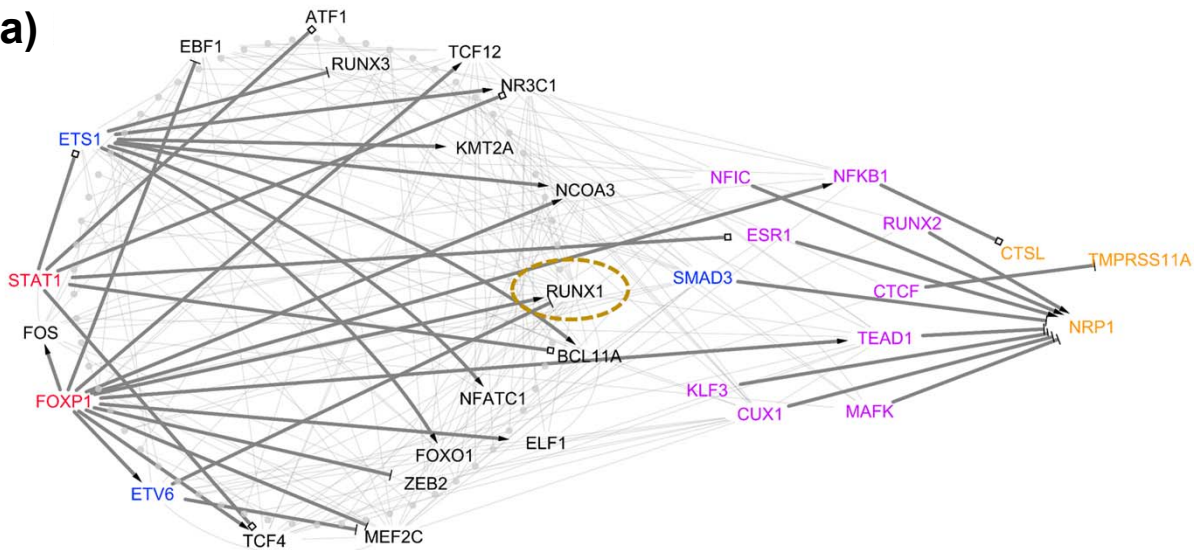

**(b)**

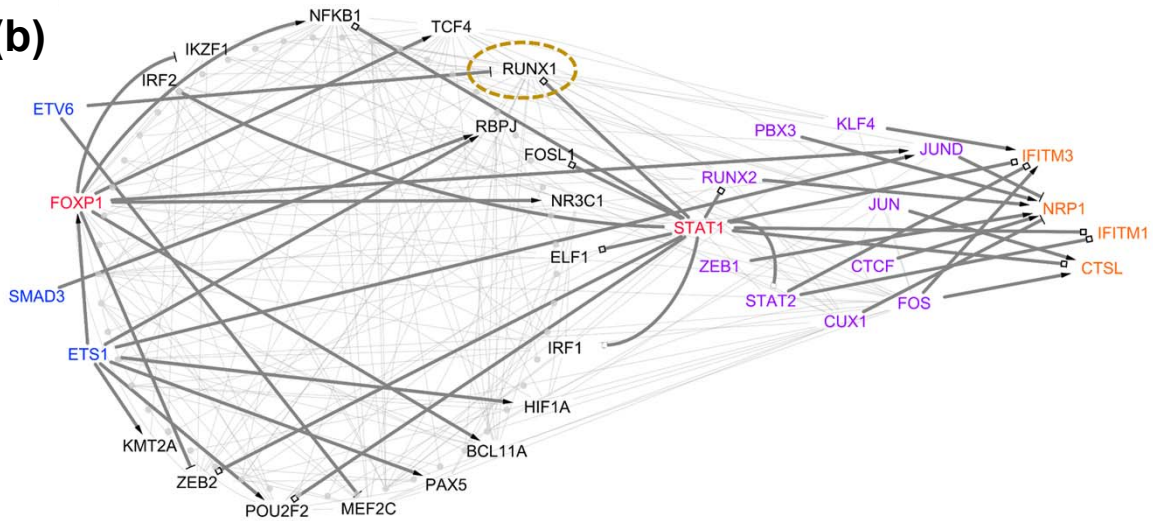

Supplement: s1 [file s1]

(a)

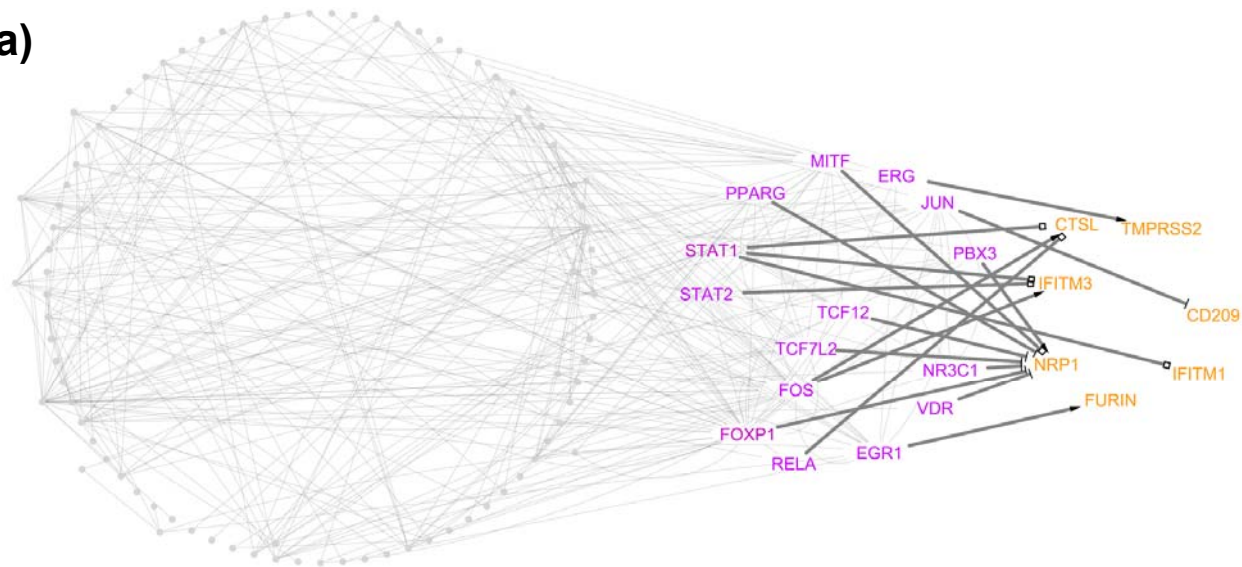

(b)

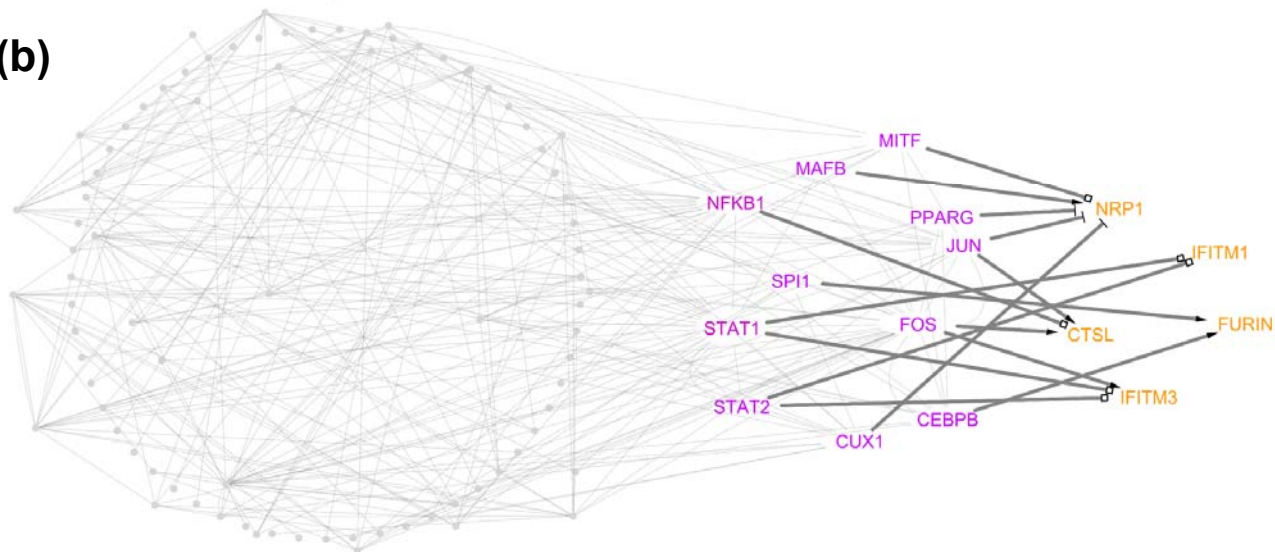

Supplement: s1 [file s1]

(a)

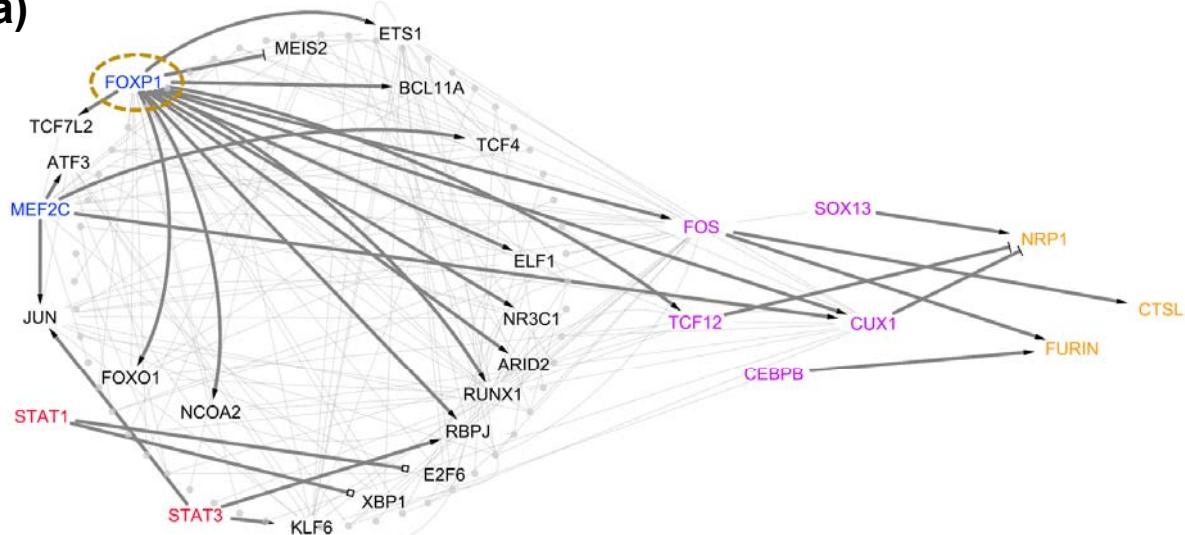

(b)

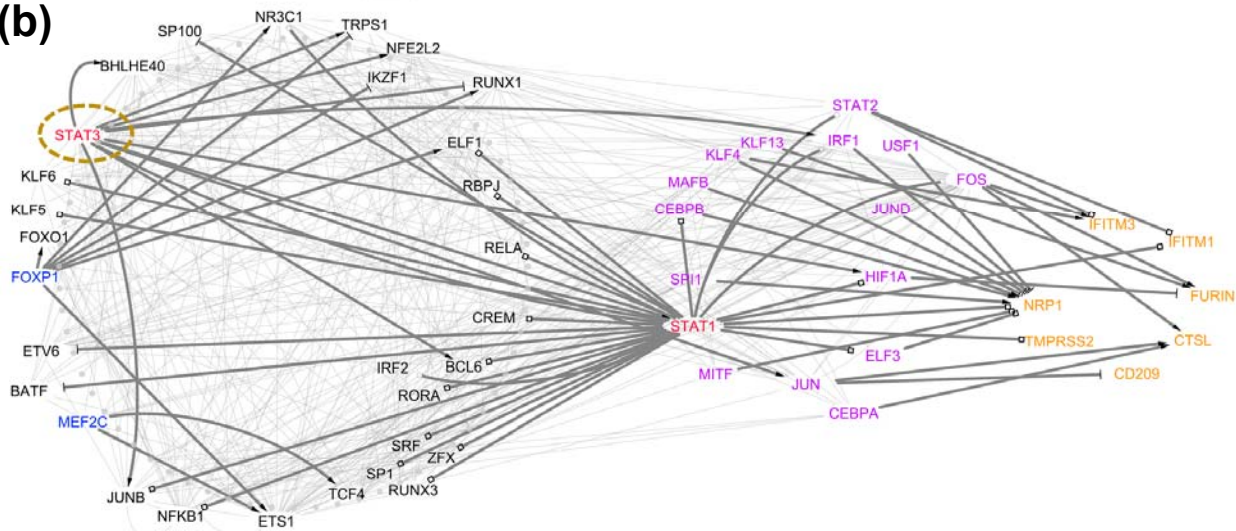

Supplement: s1 [file s1]

**(a)**

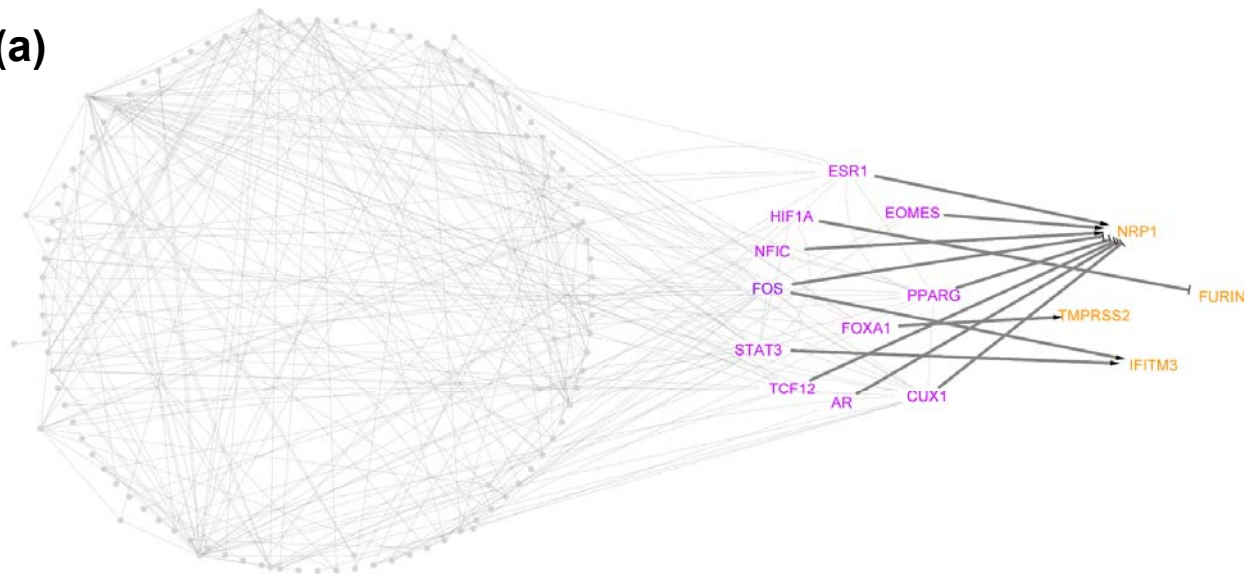

**(b)**

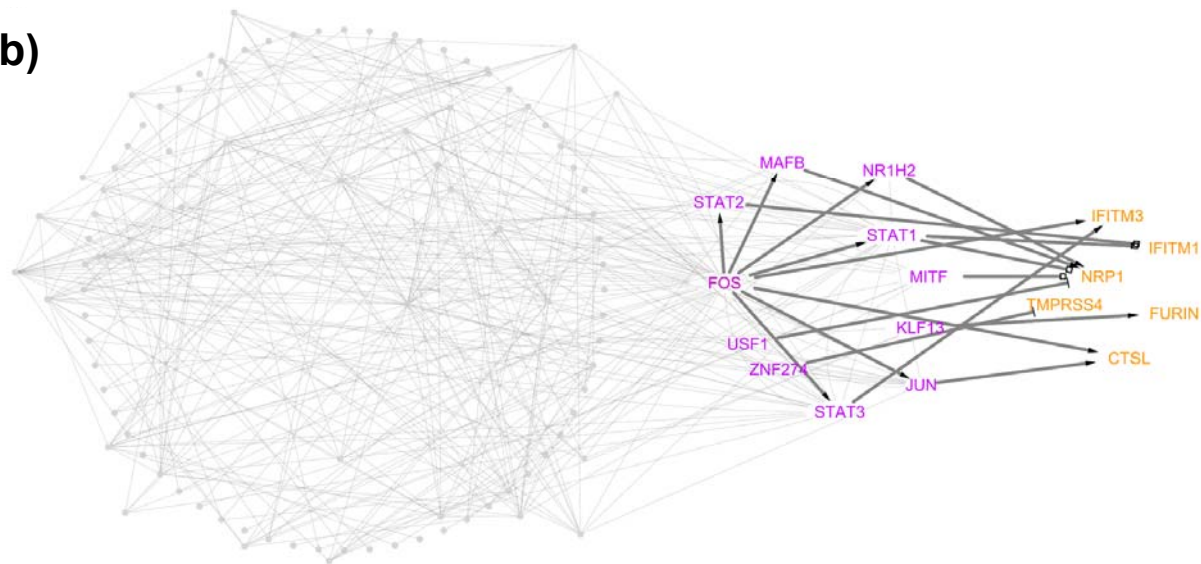

Supplement: s1 [file s1]

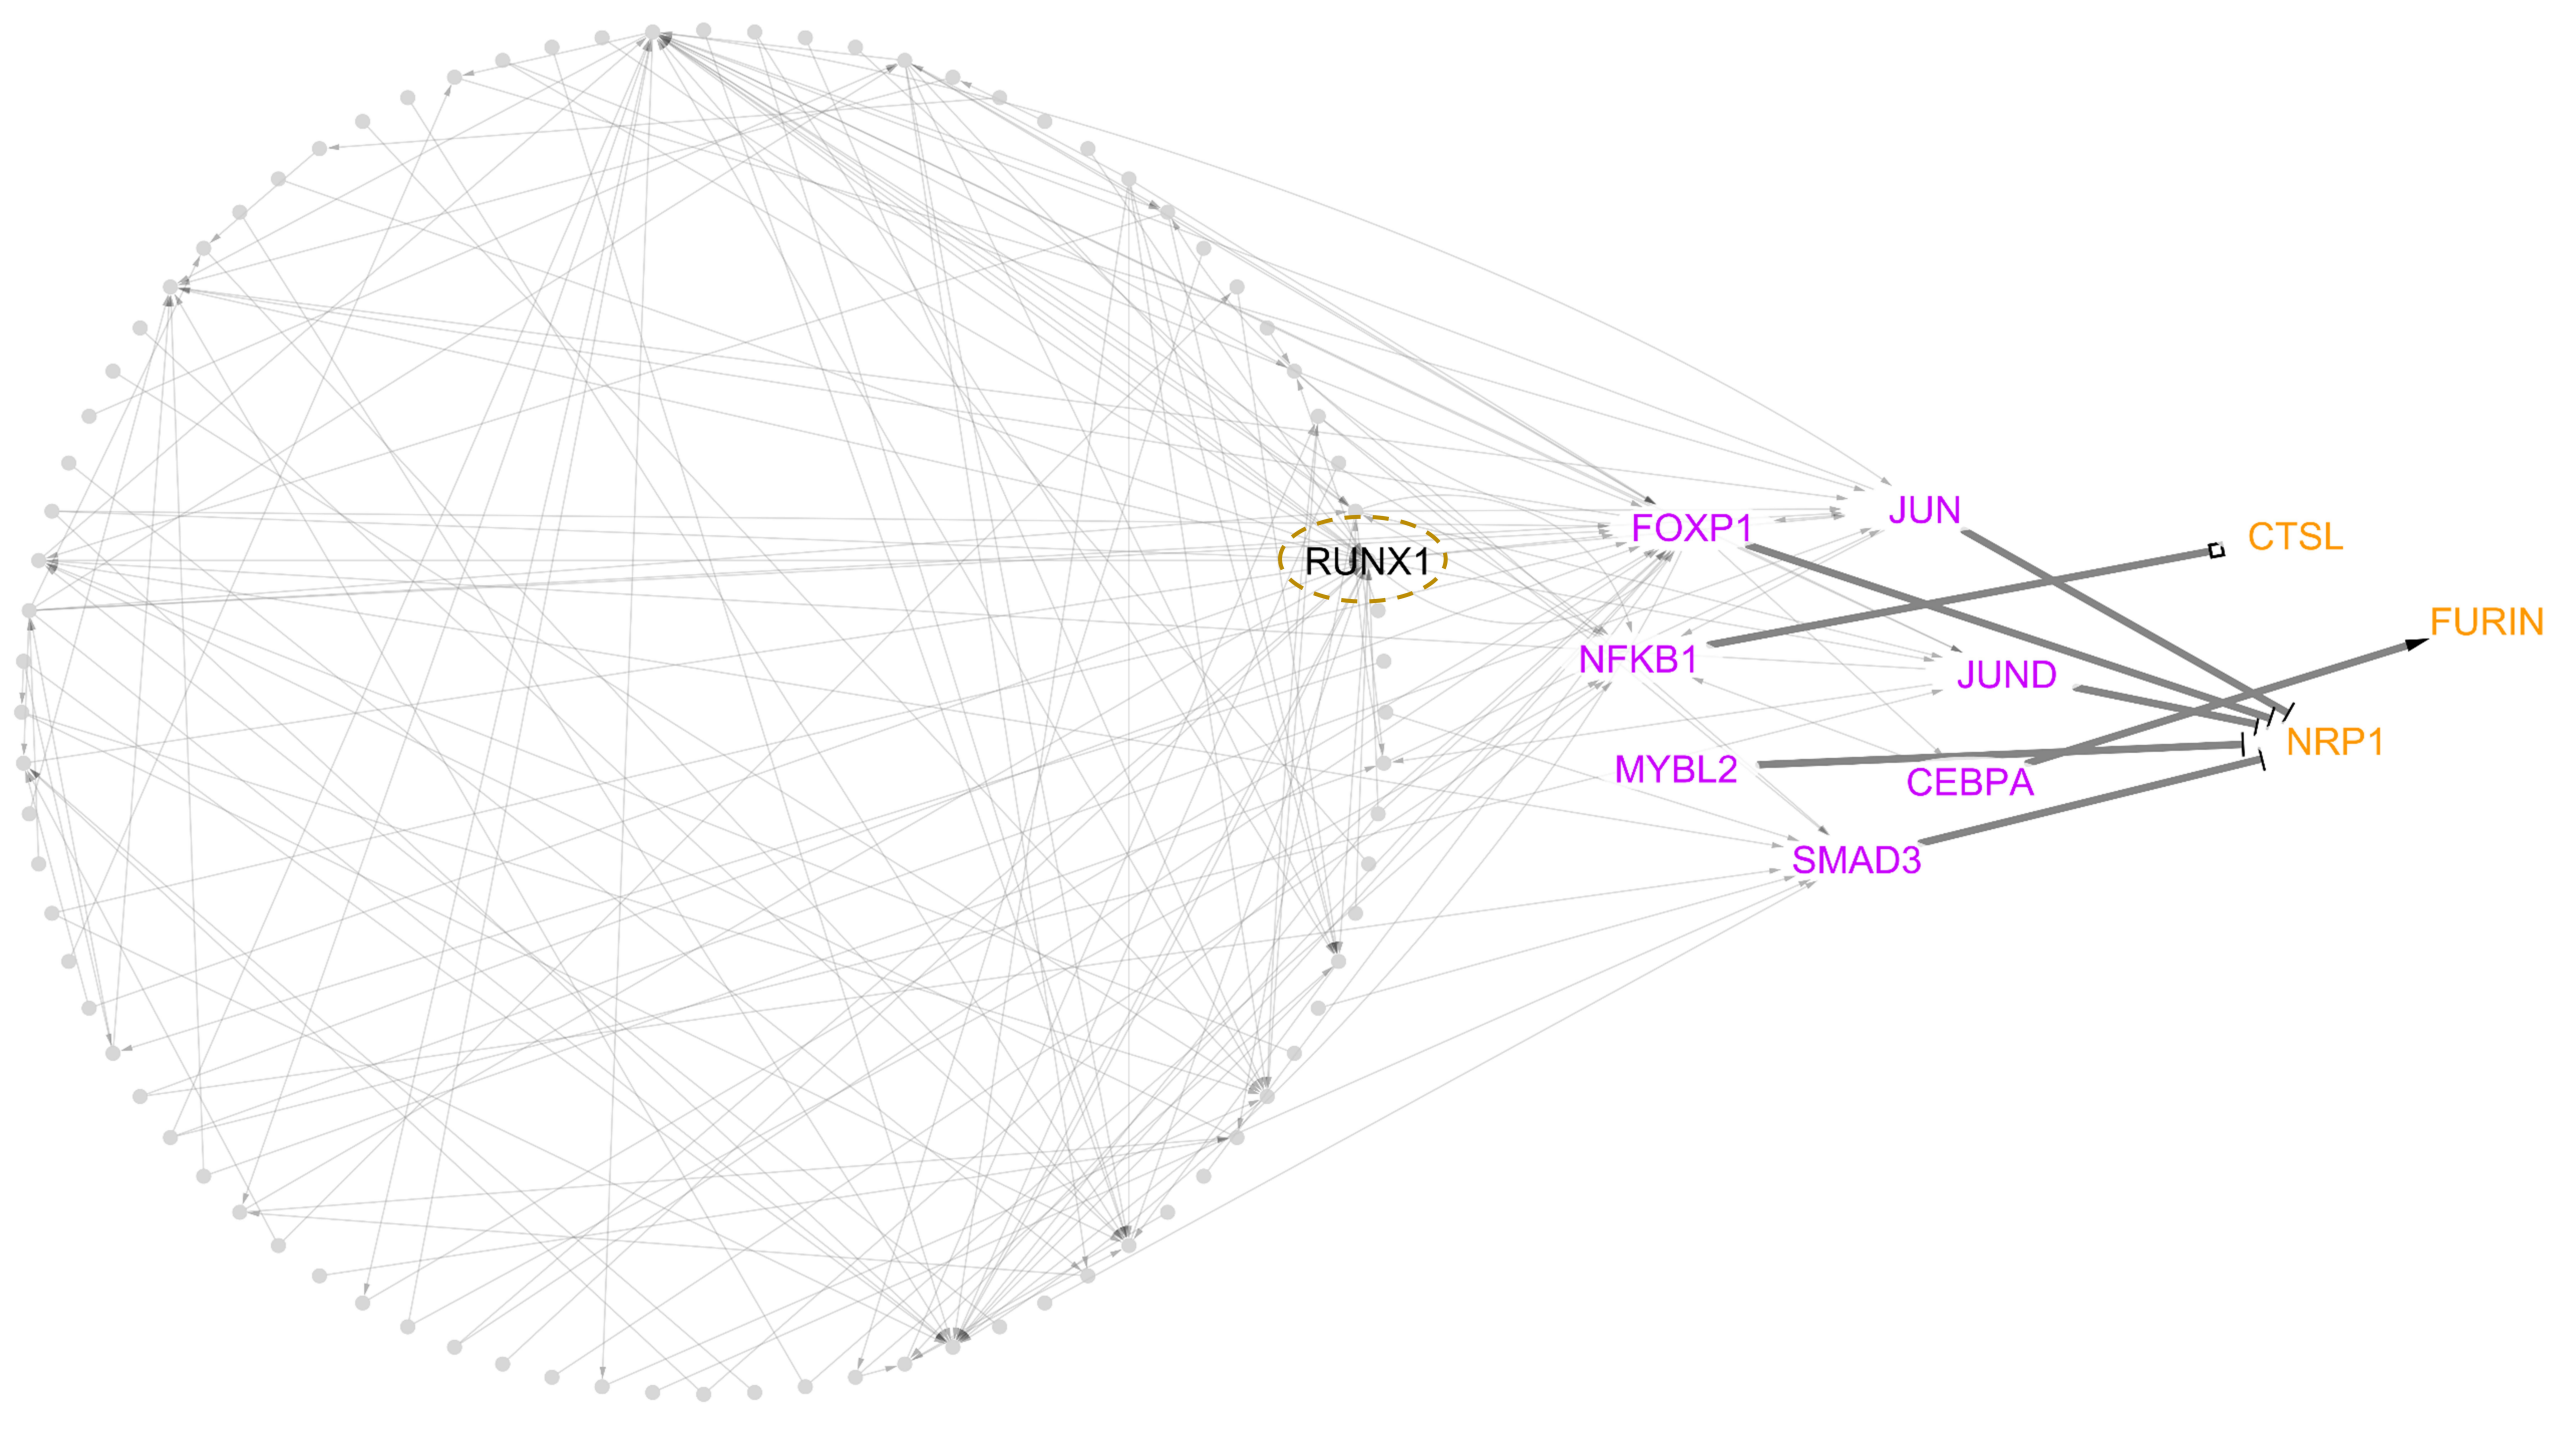

Supplement: s1 [file s1]

**(a)**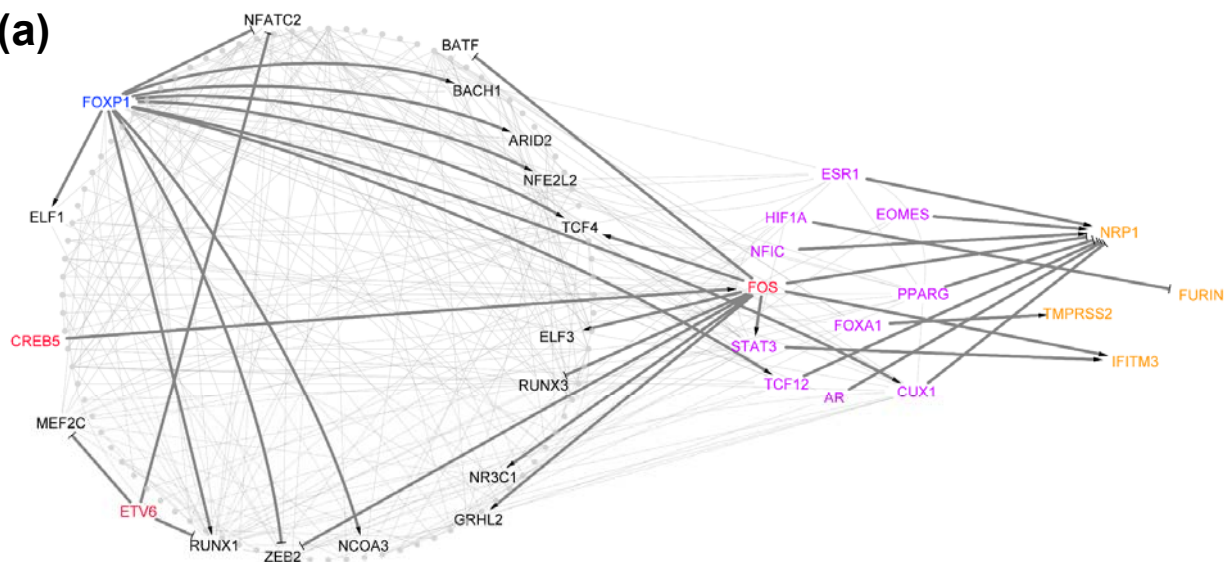**(b)**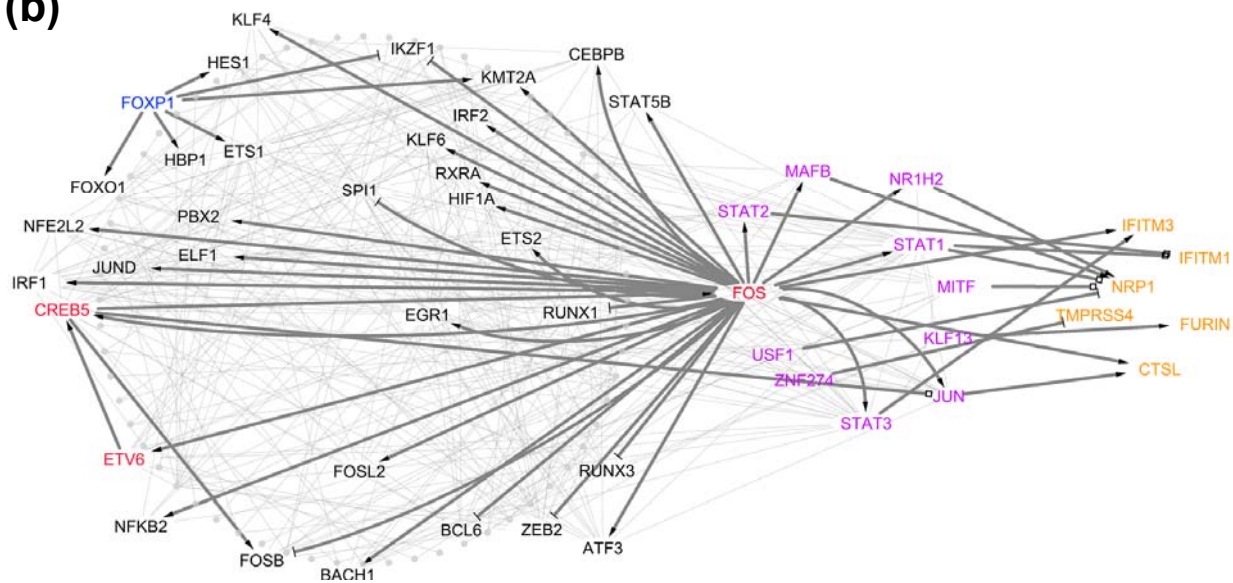

Supplement: s1 [file s1]

(a)

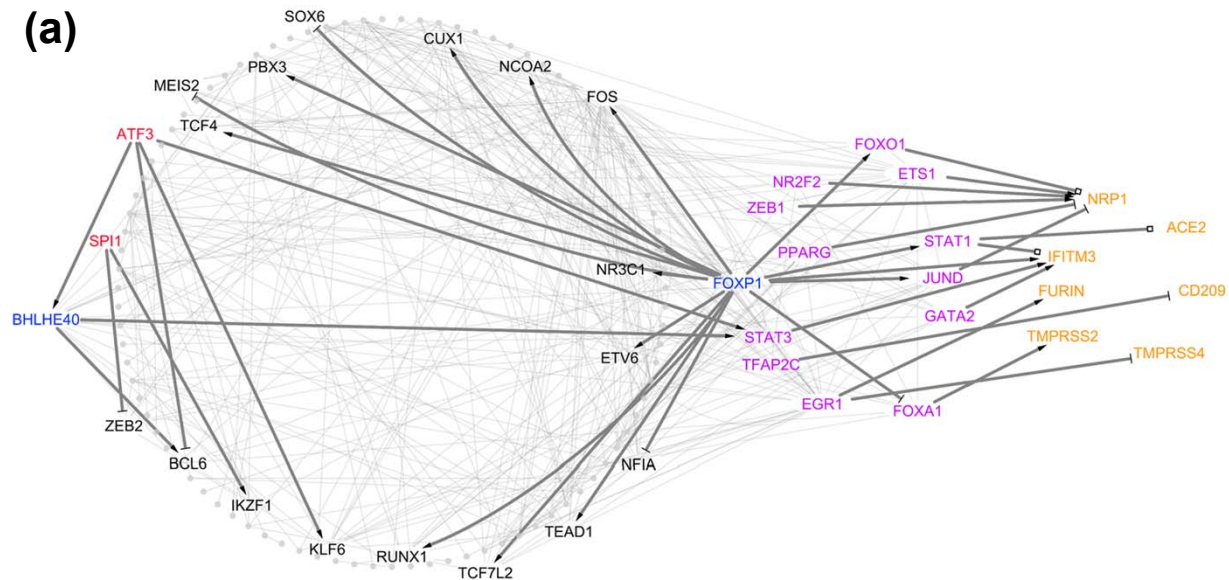

(b)

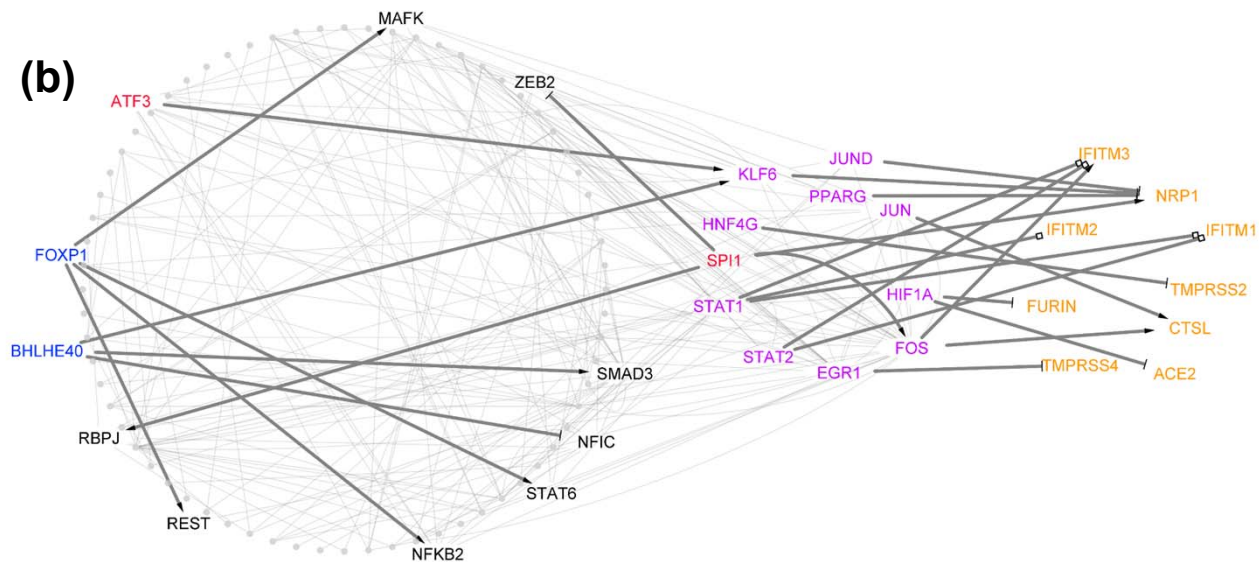

Supplement: s1 [file s1]

**(a)**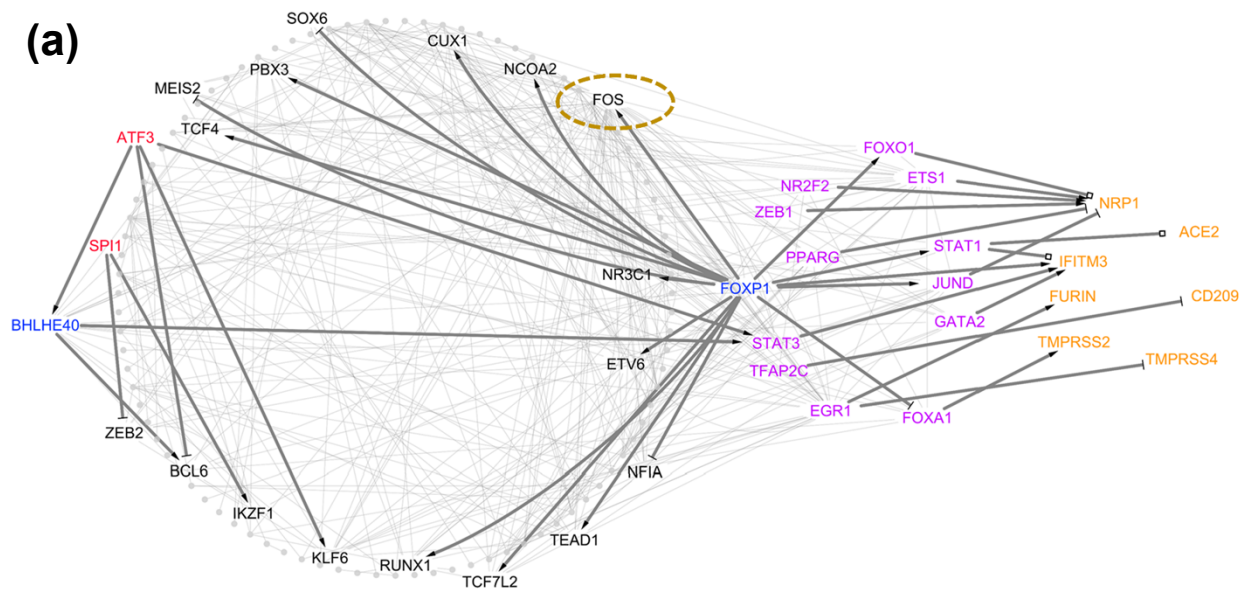**(b)**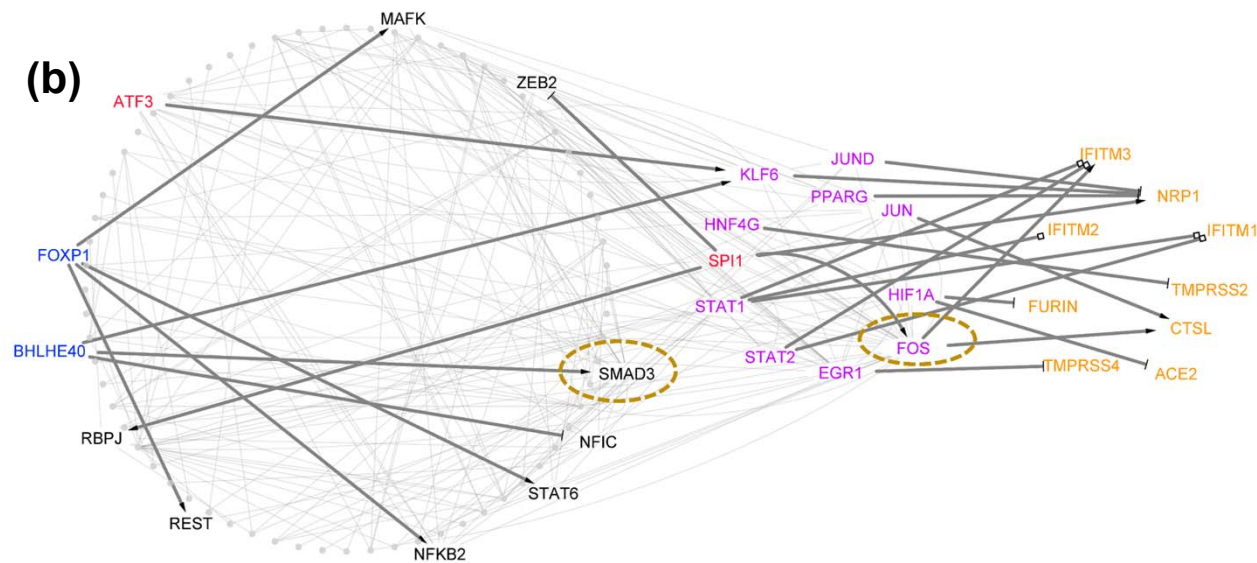

Supplement: s1 [file s1]

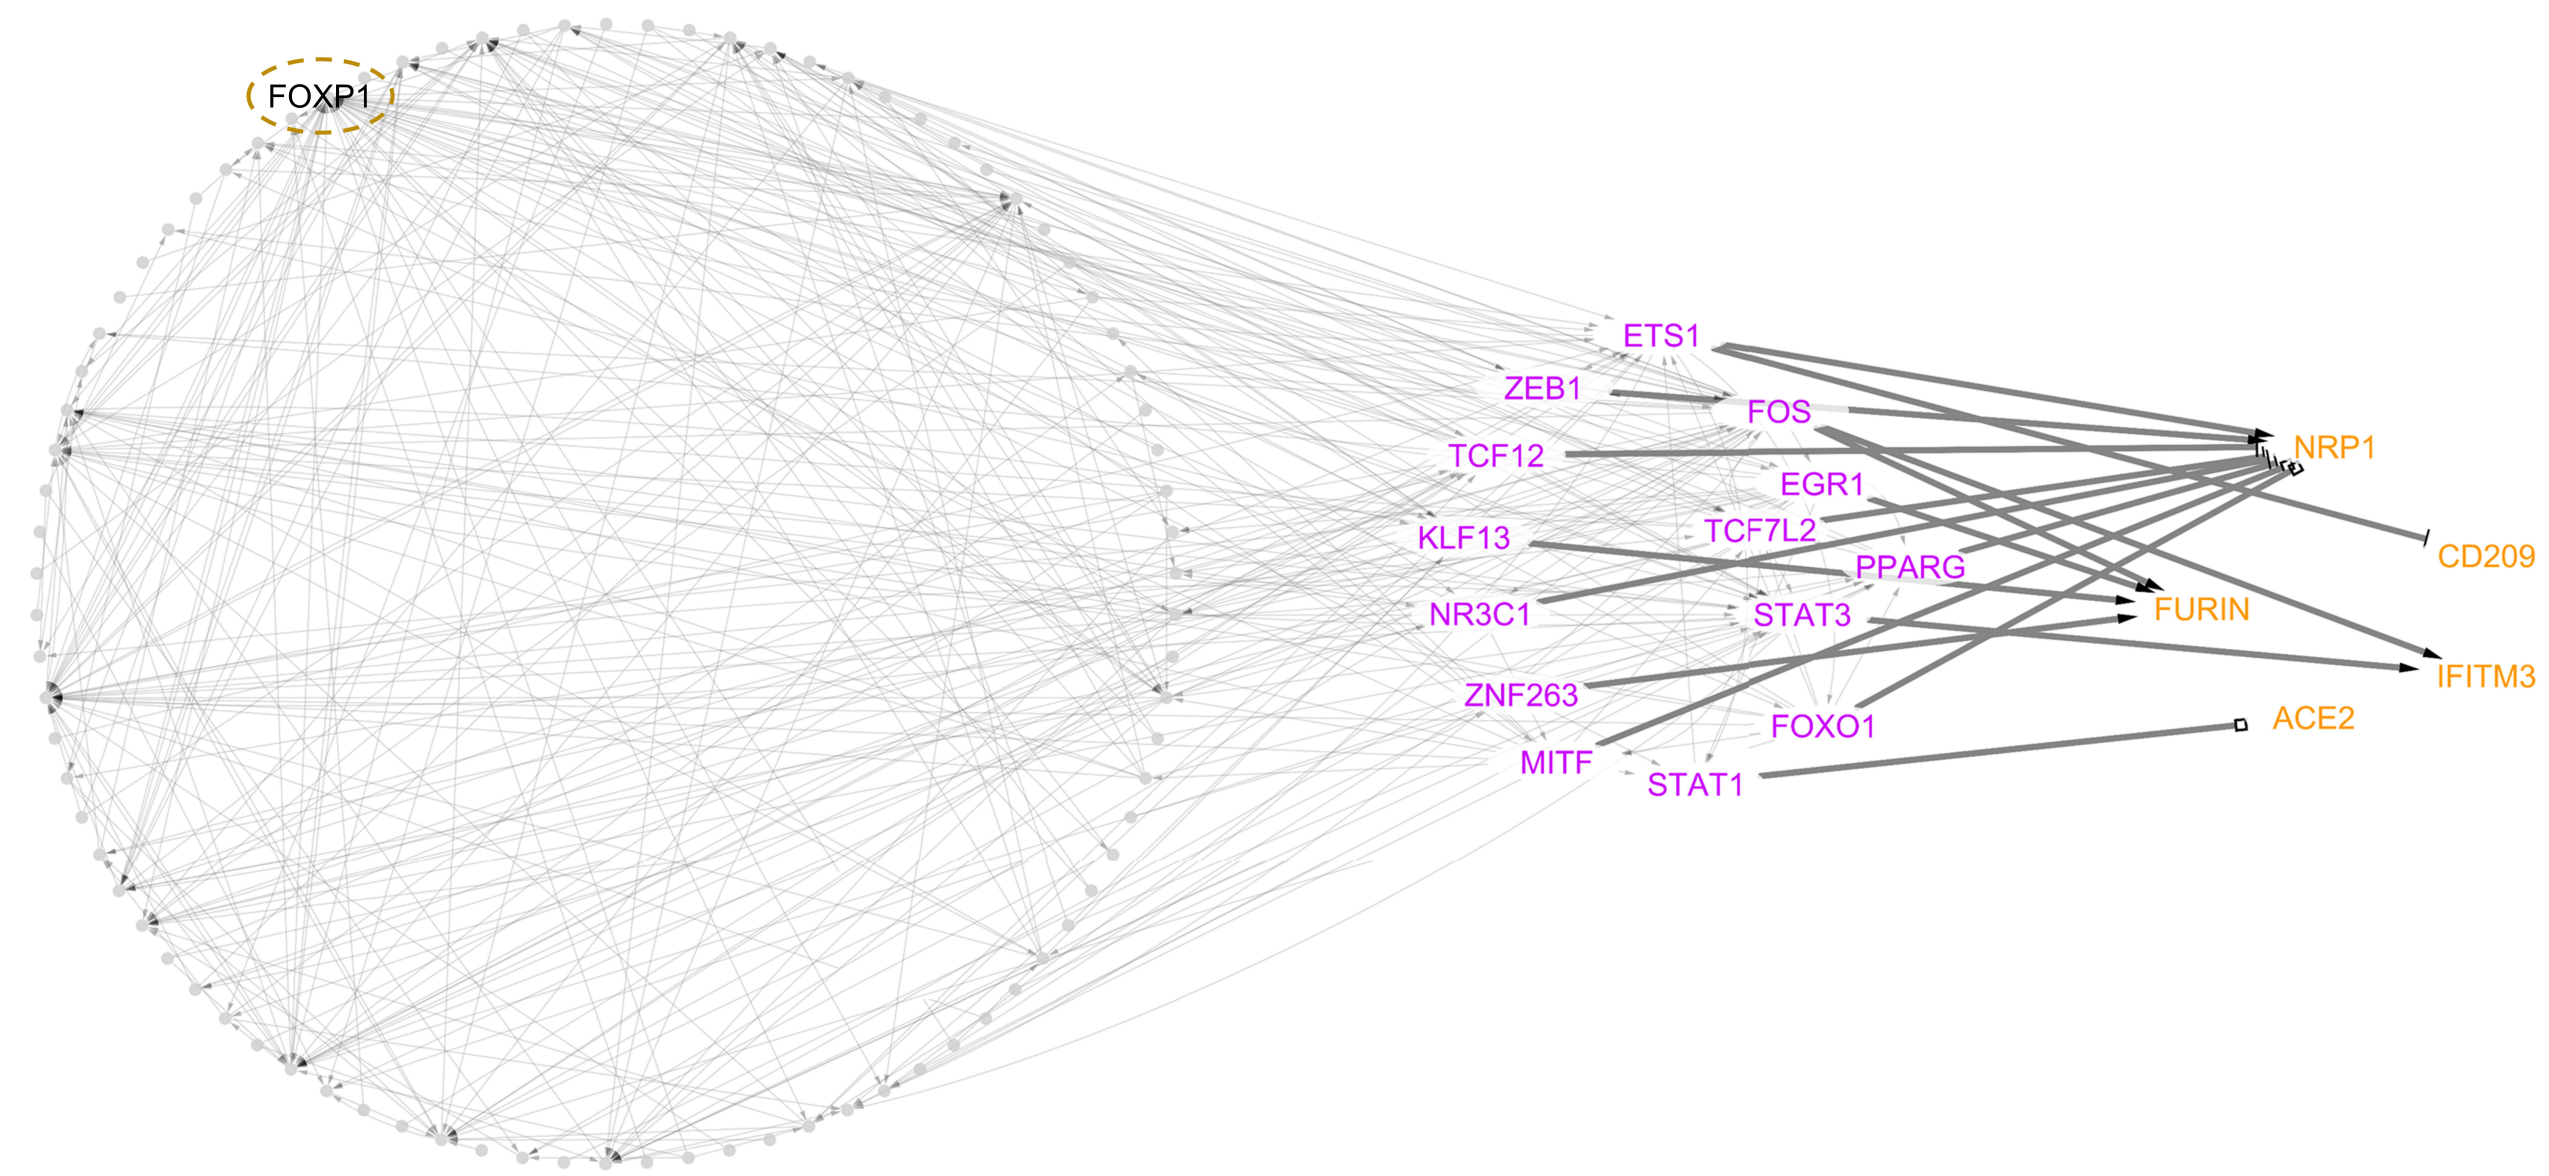

Supplement: s1 [file s1]

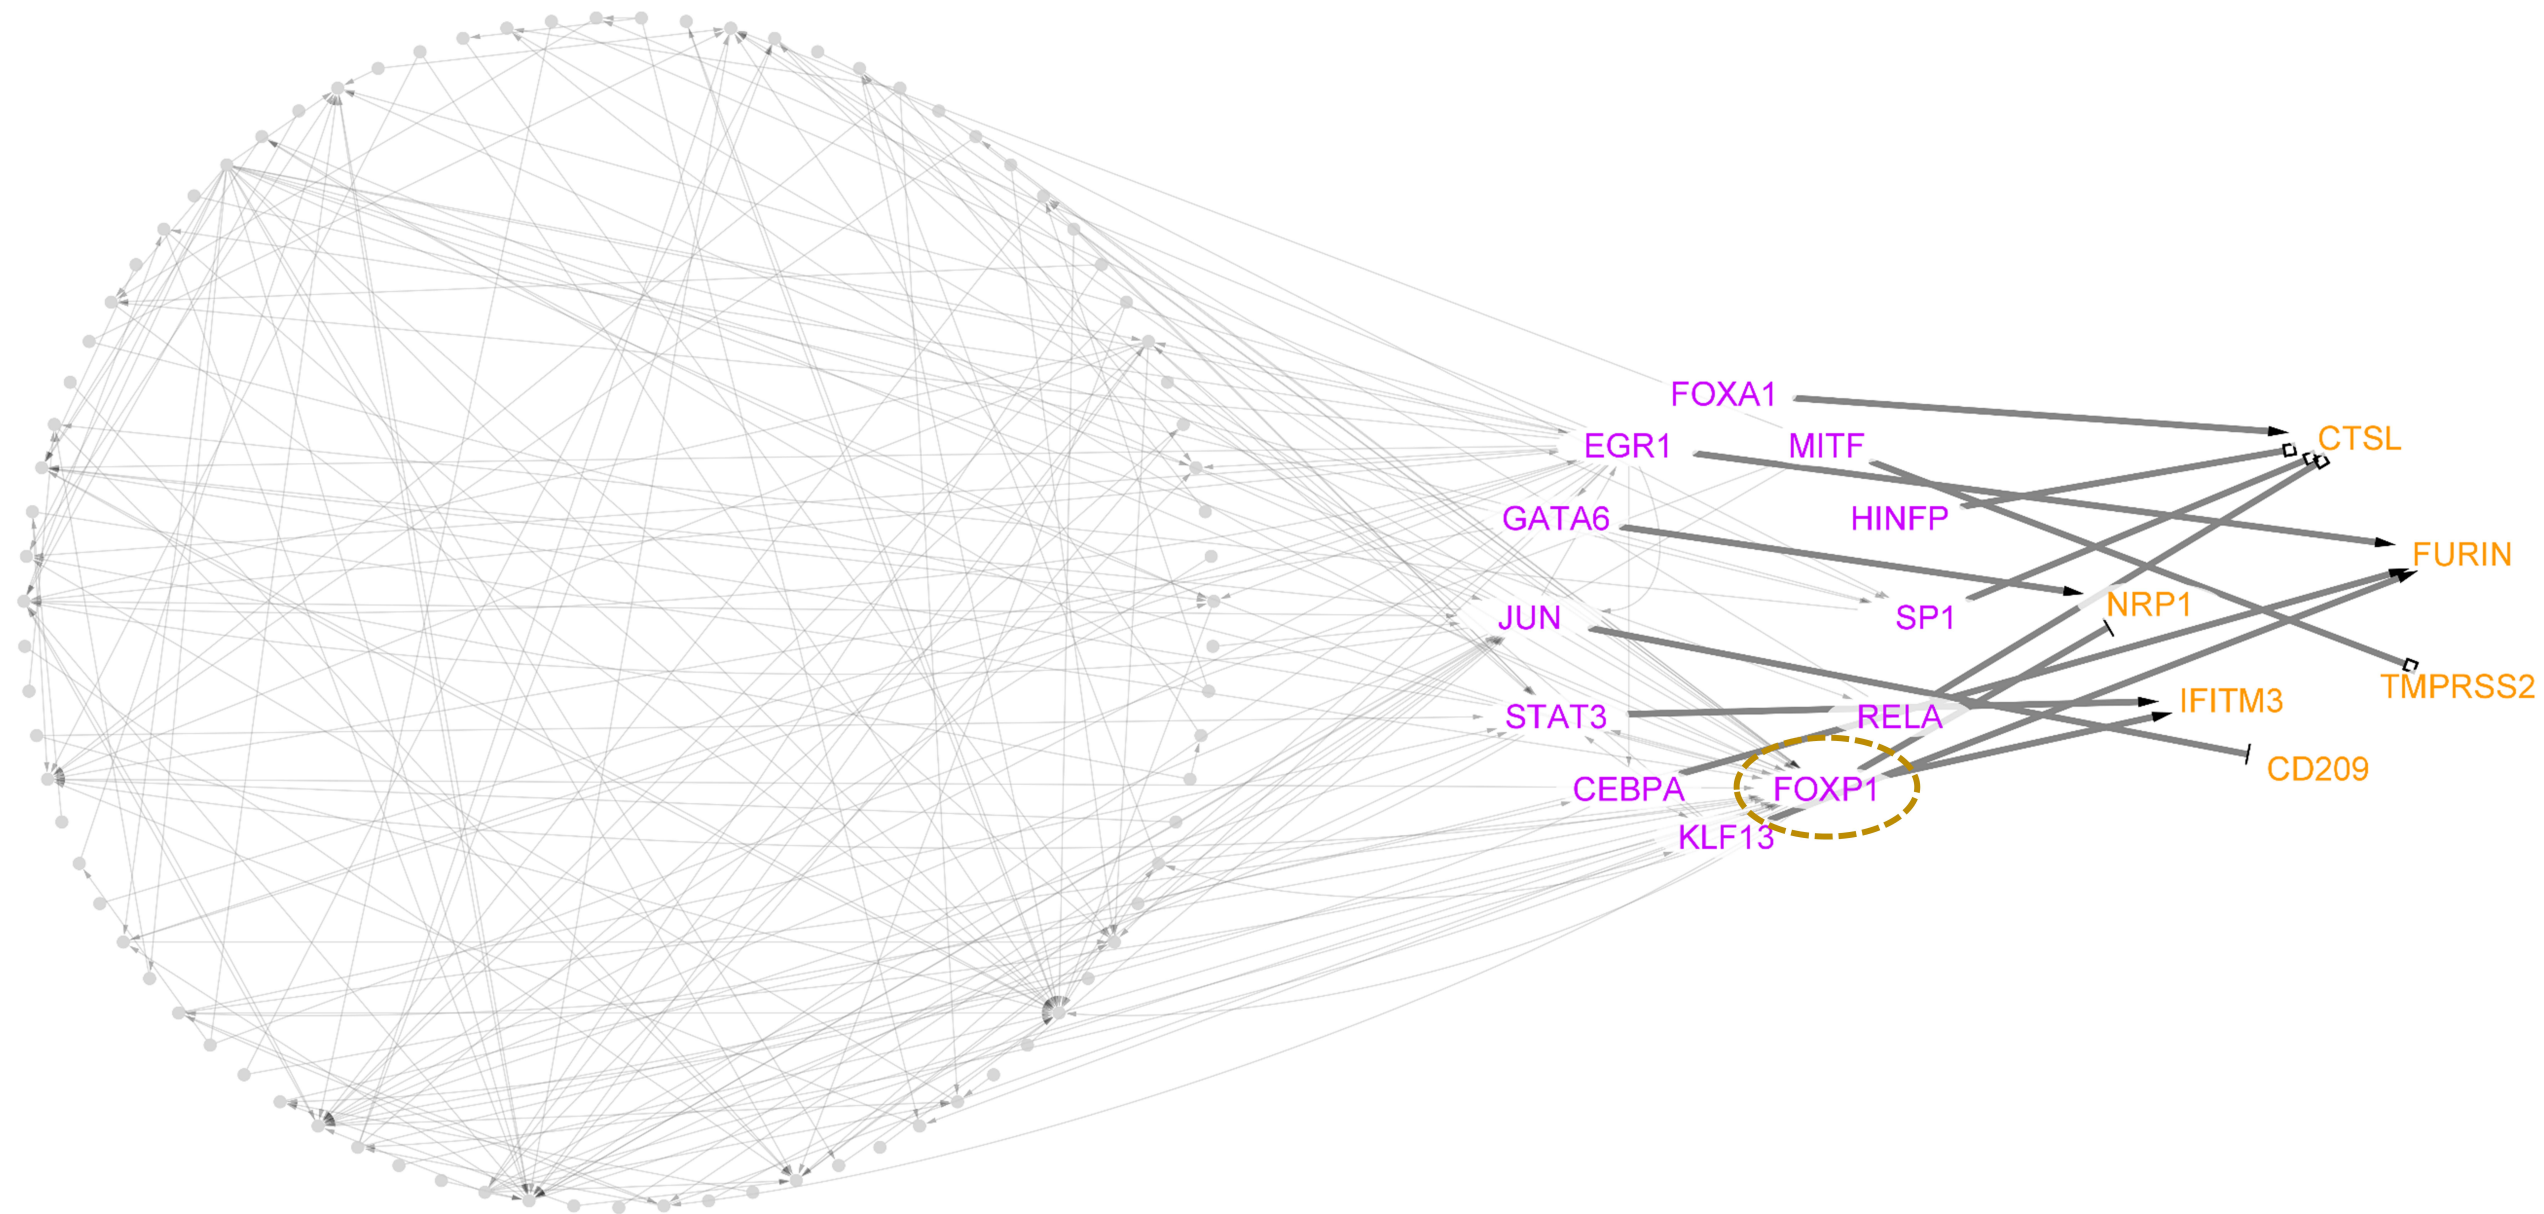

Supplement: s1 [file s1]

**(a)**

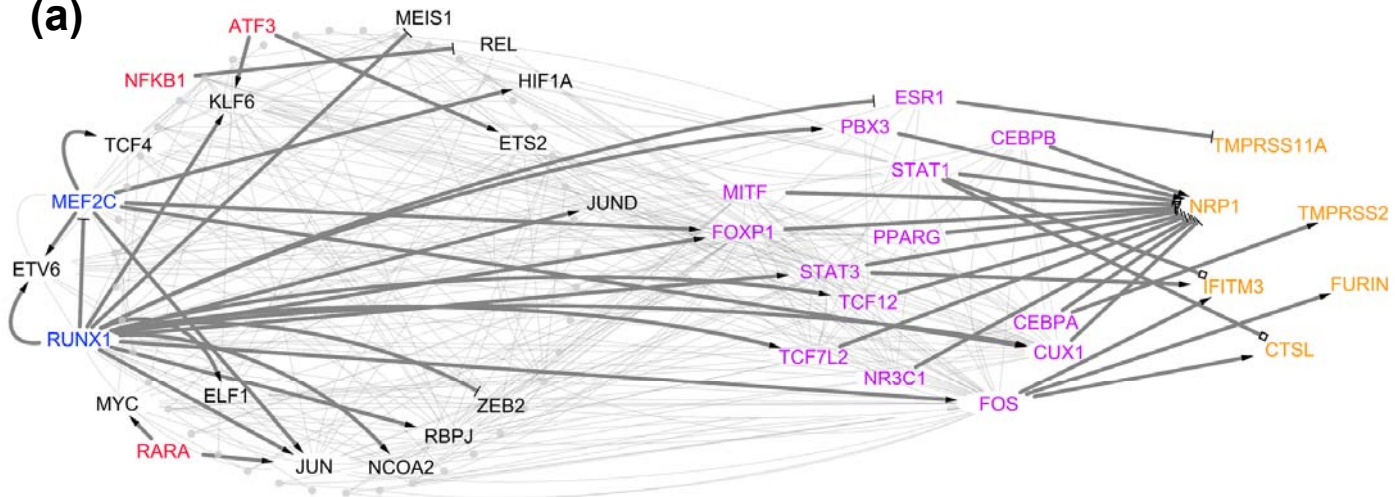

**(b)**

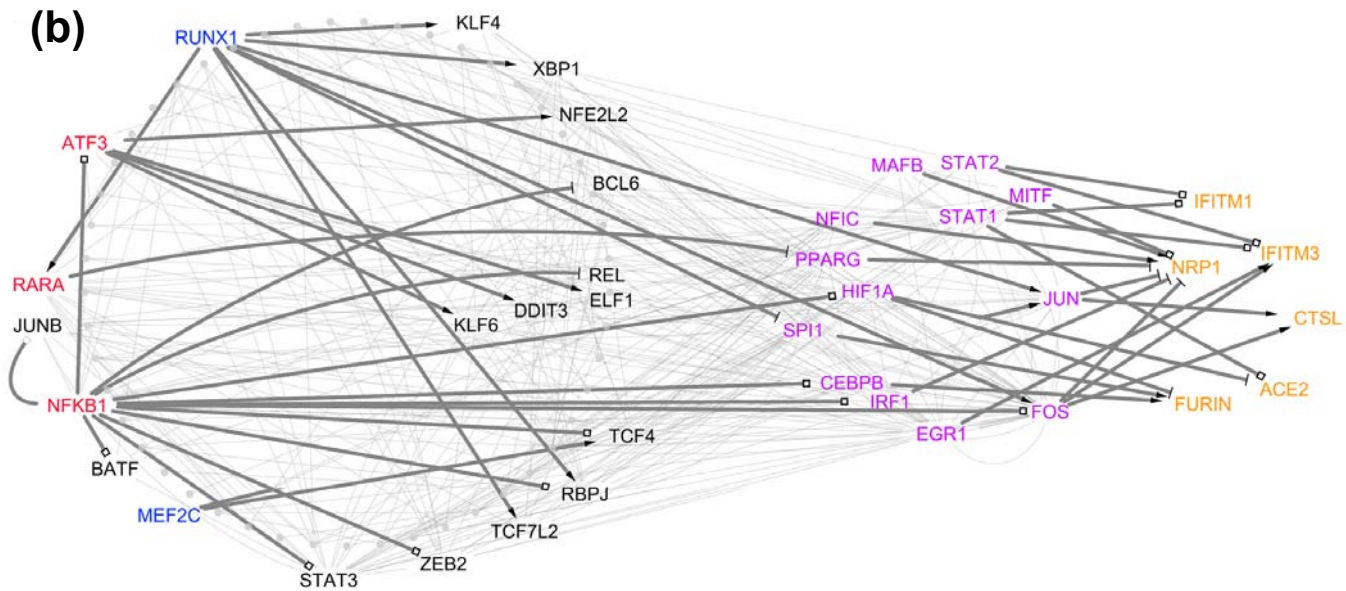

Supplement: s1 [file s1]

**(b)**

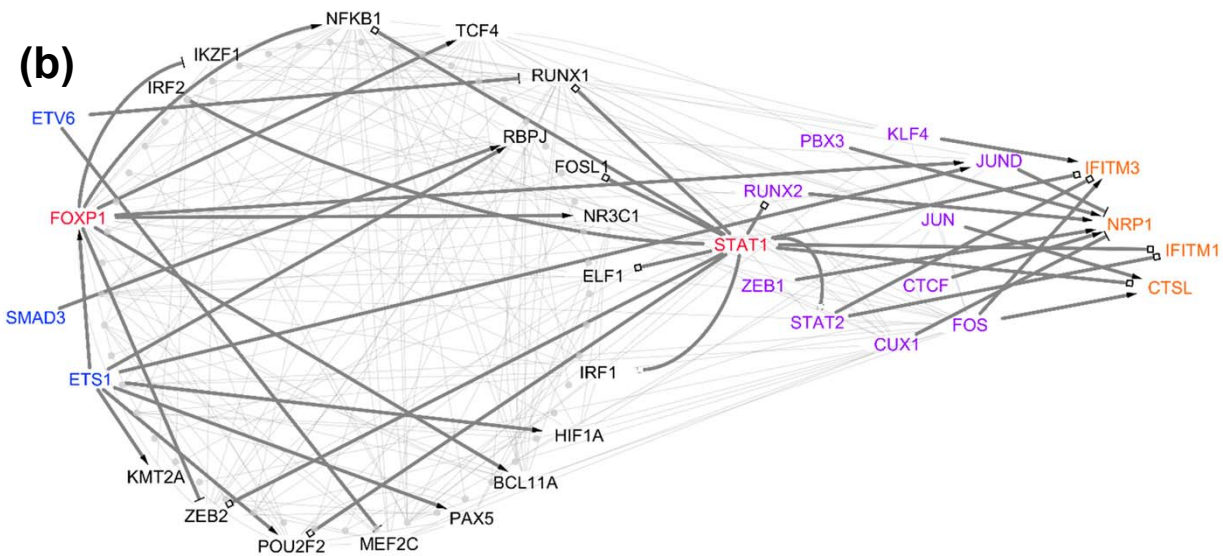

Supplement: s1 [file s1]

**(a)**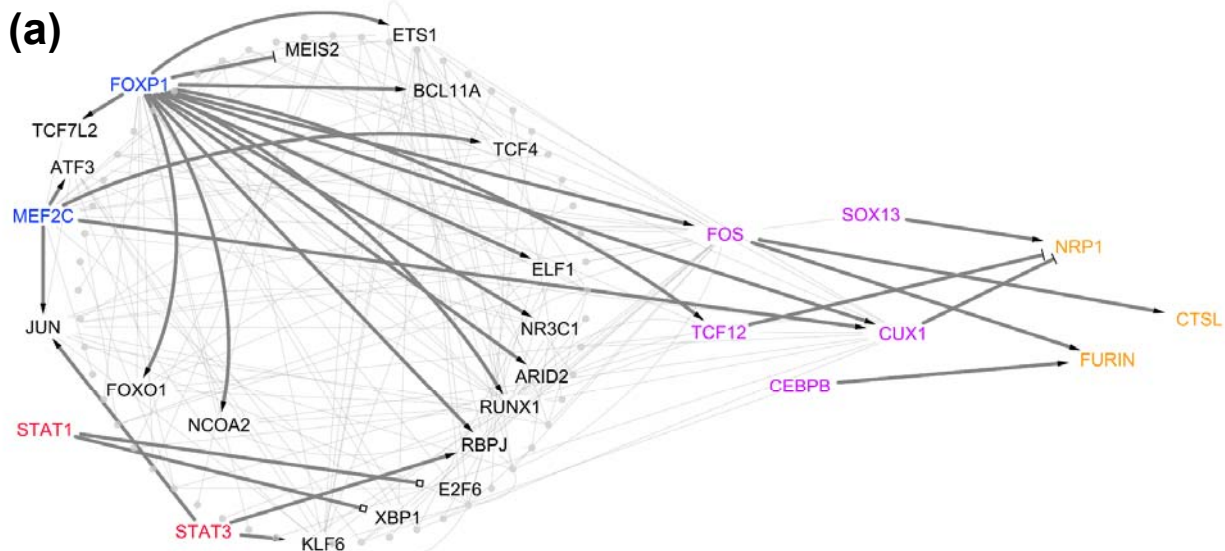**(b)**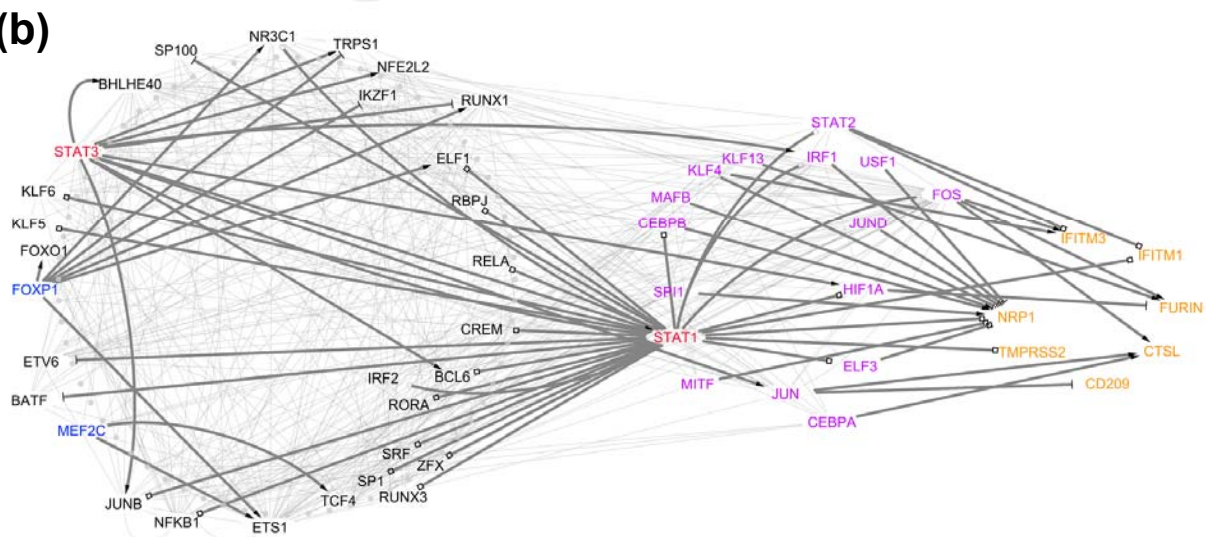

Supplement: s1 [file s1]

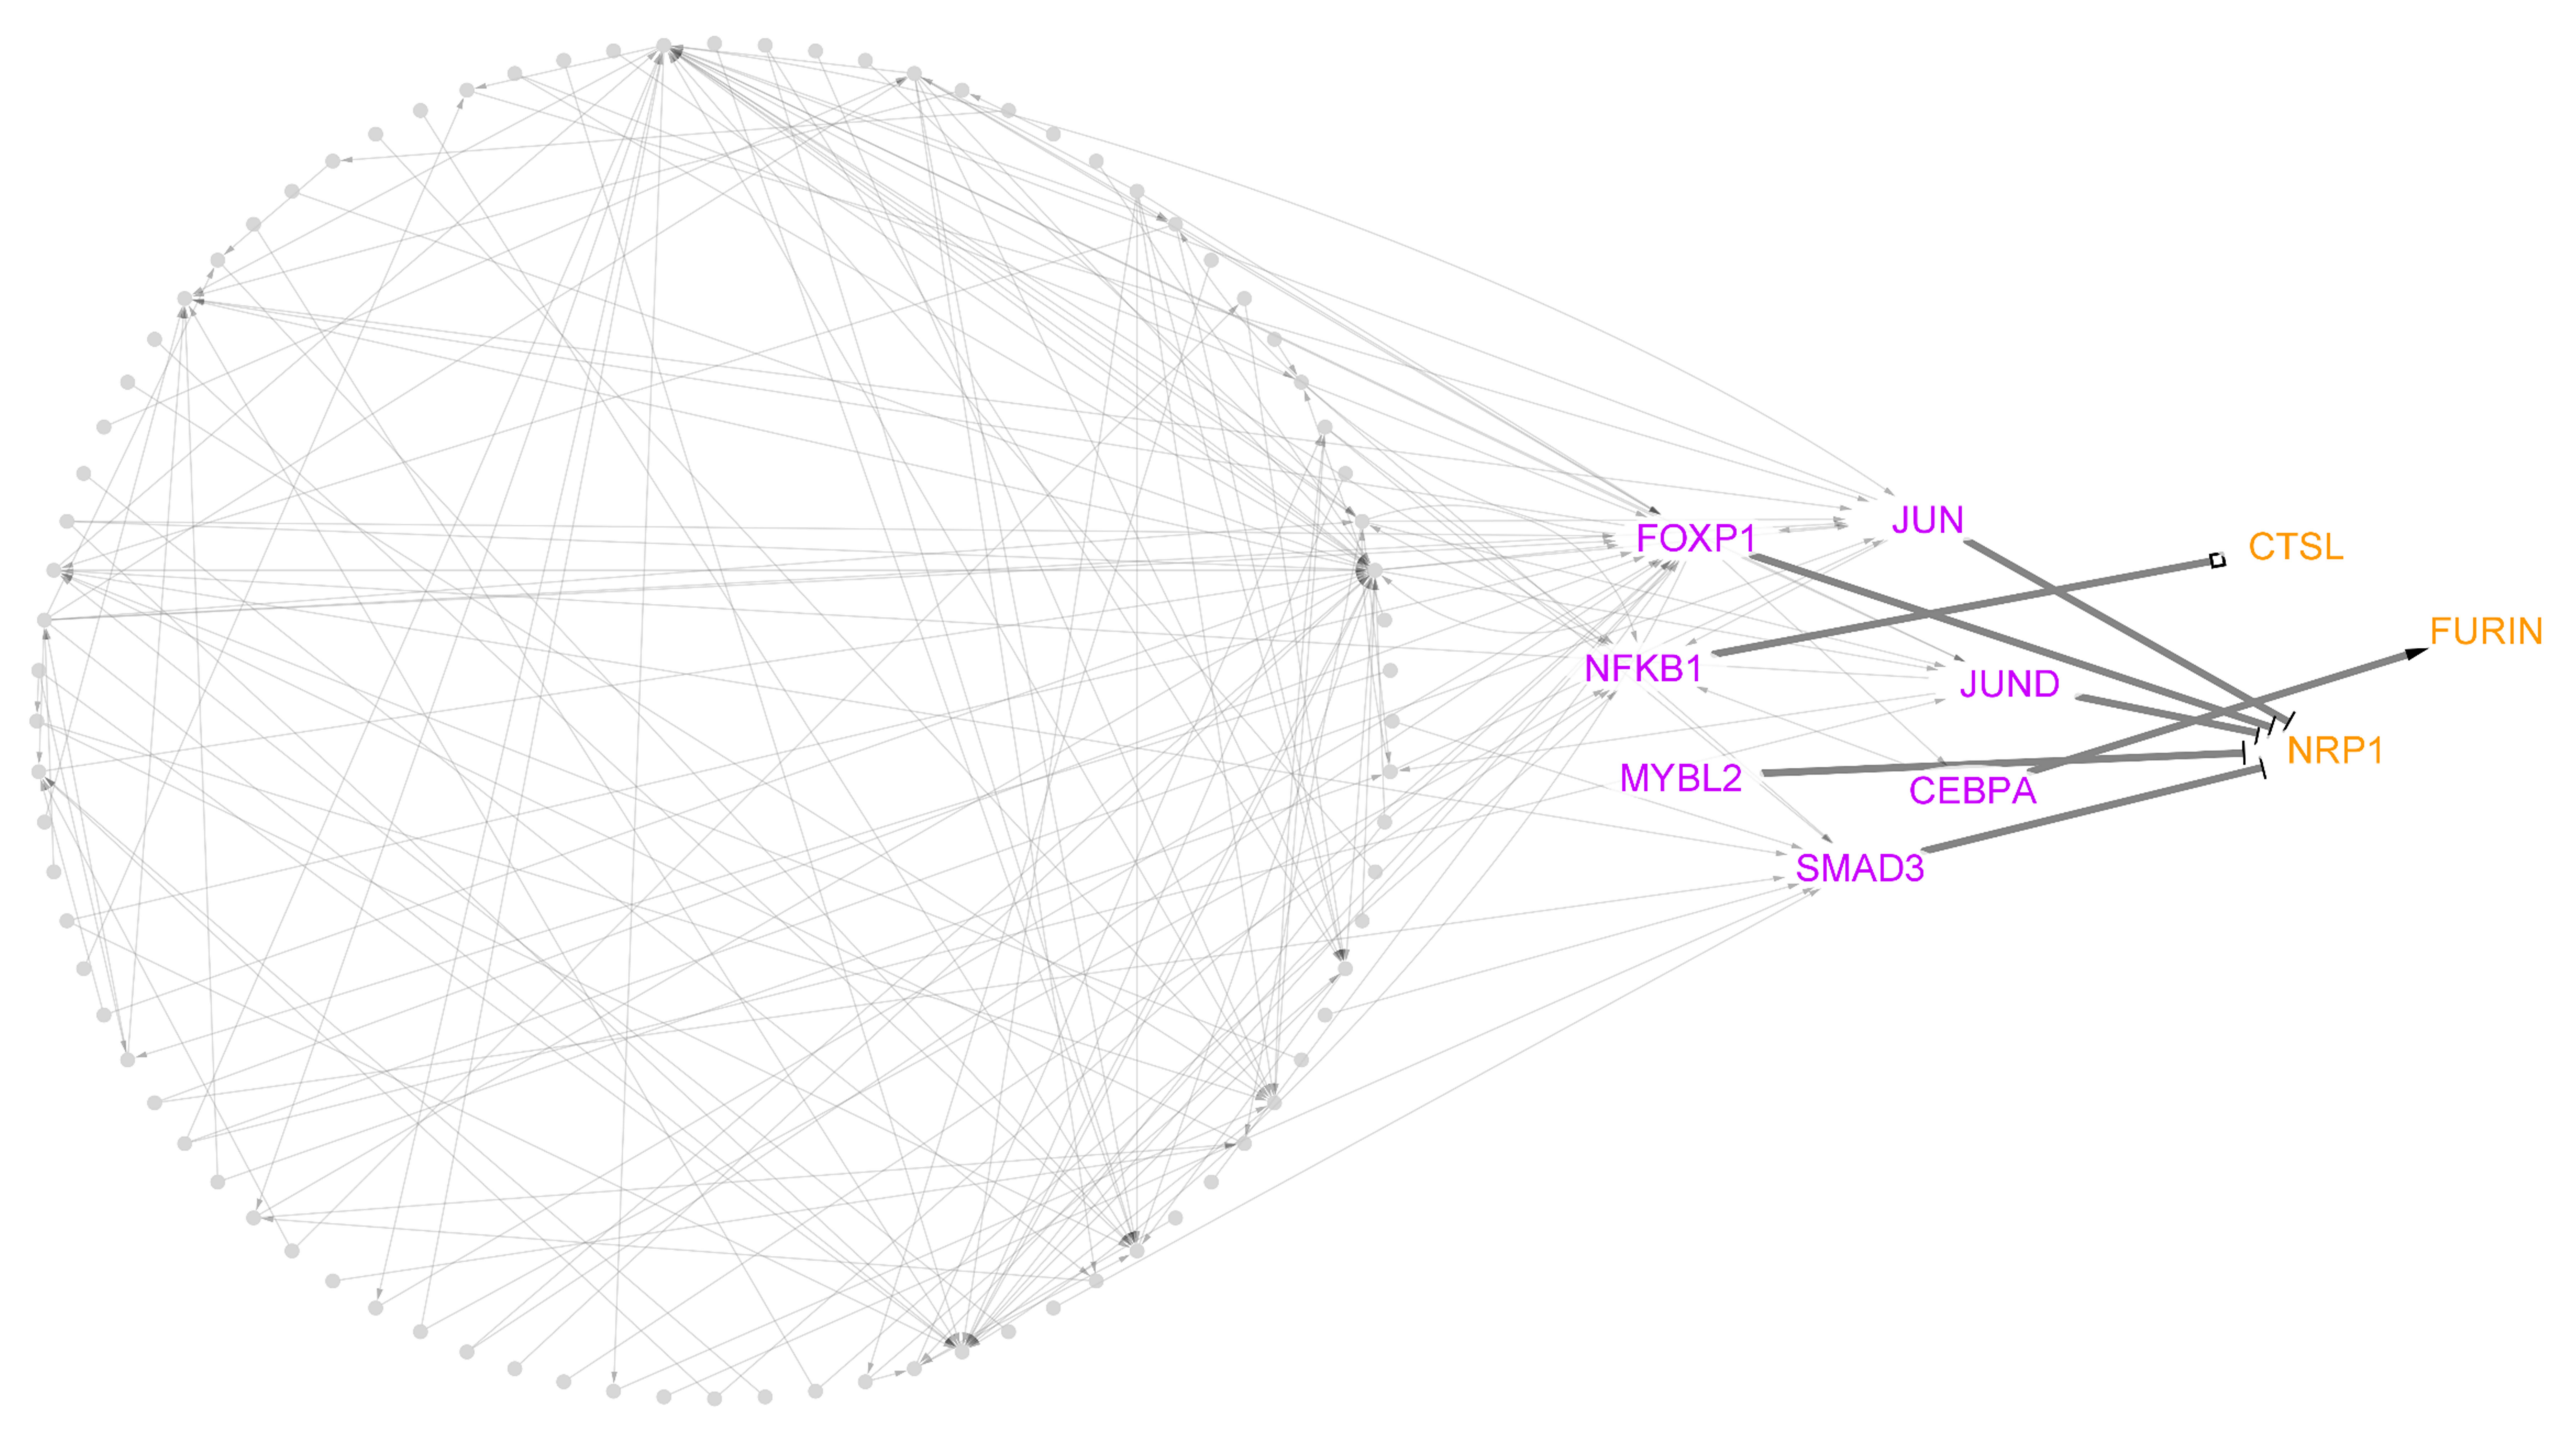

Supplement: s1 [file s1]

**(a)**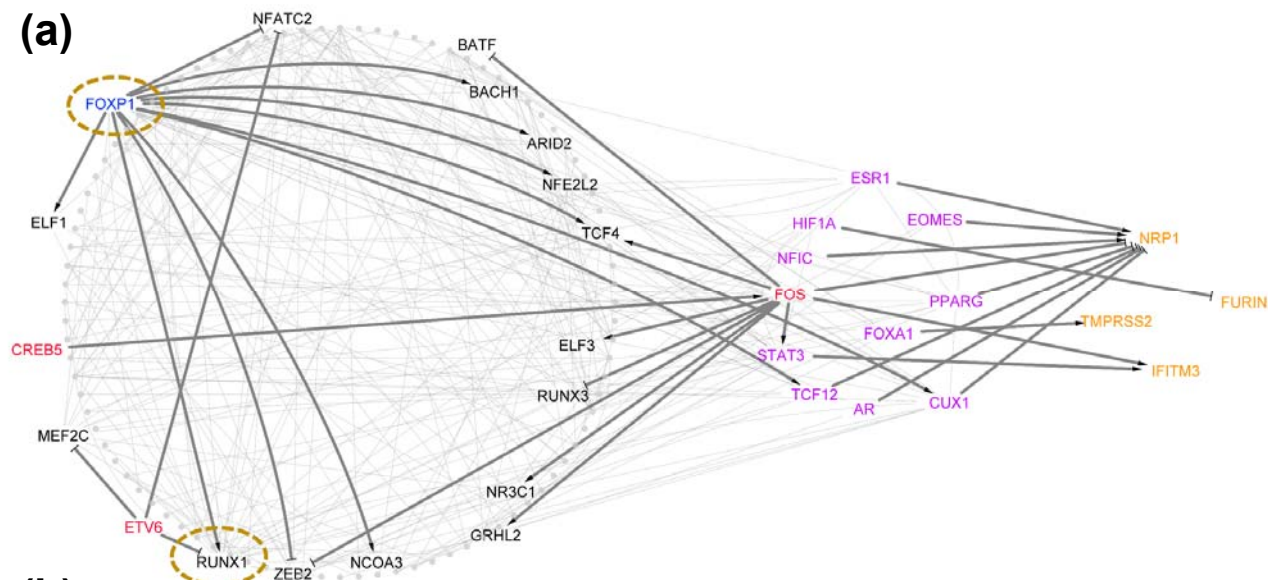**(b)**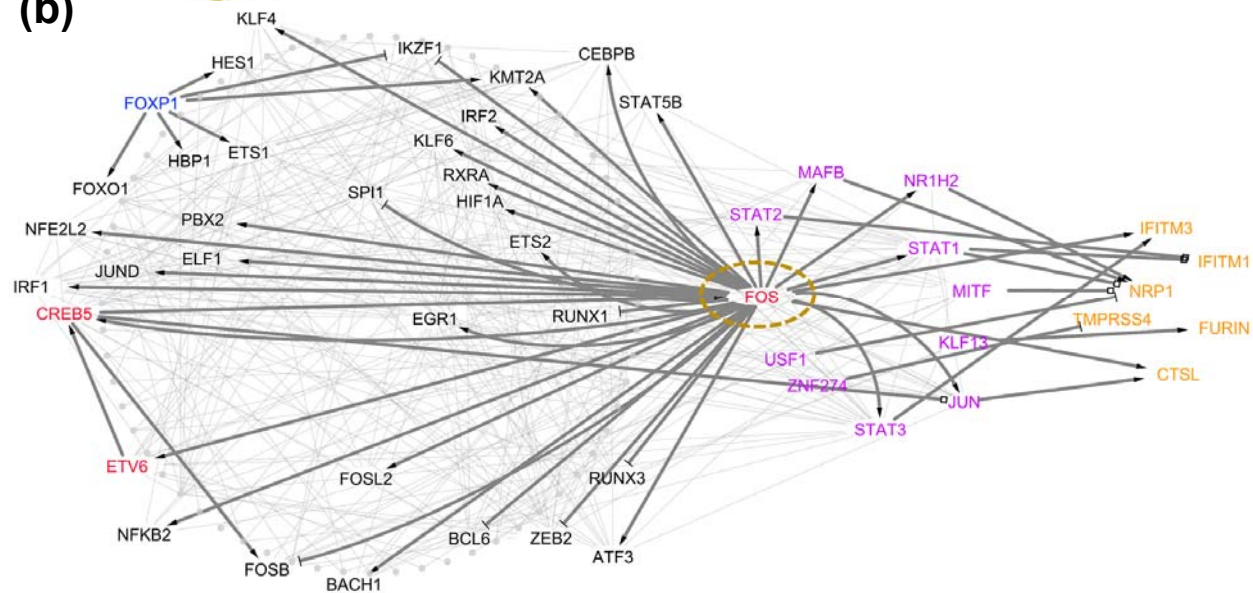

Supplement: s1 [file s1]

**(a)**

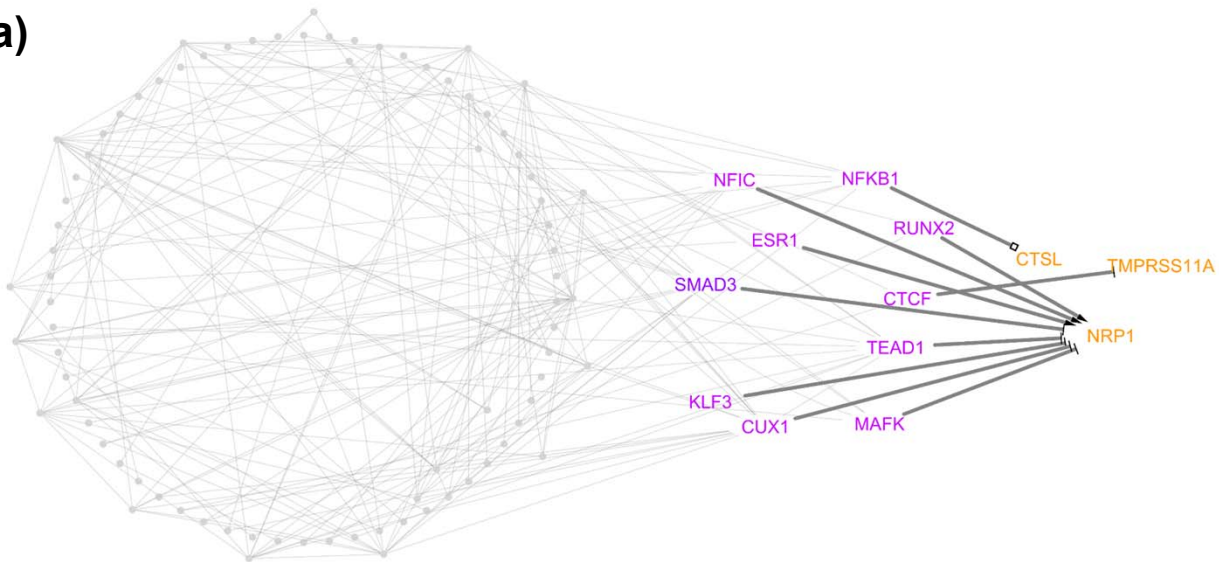

**(b)**

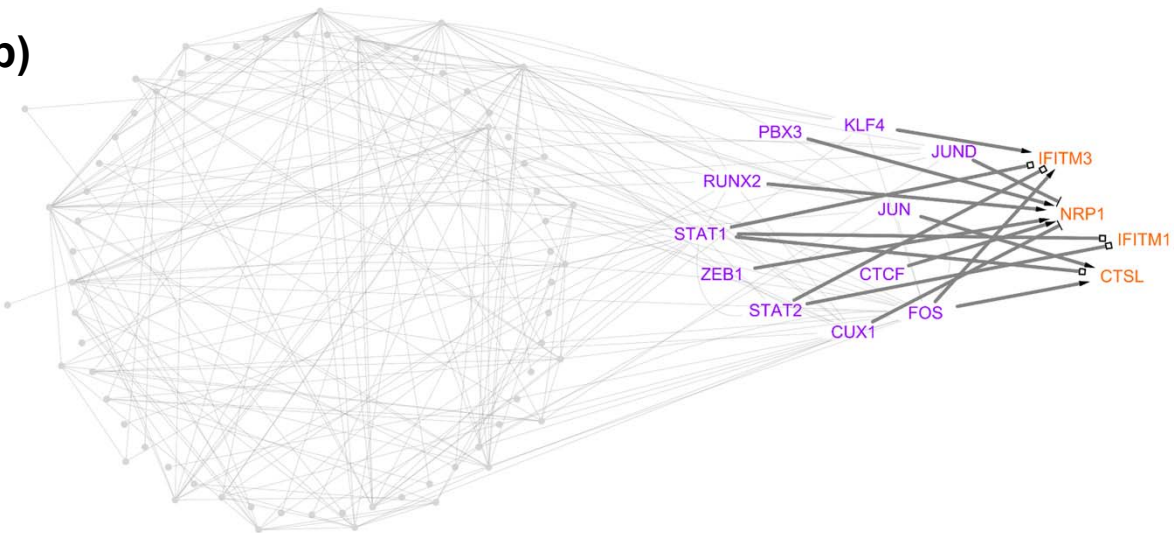

Supplement: s1 [file s1]

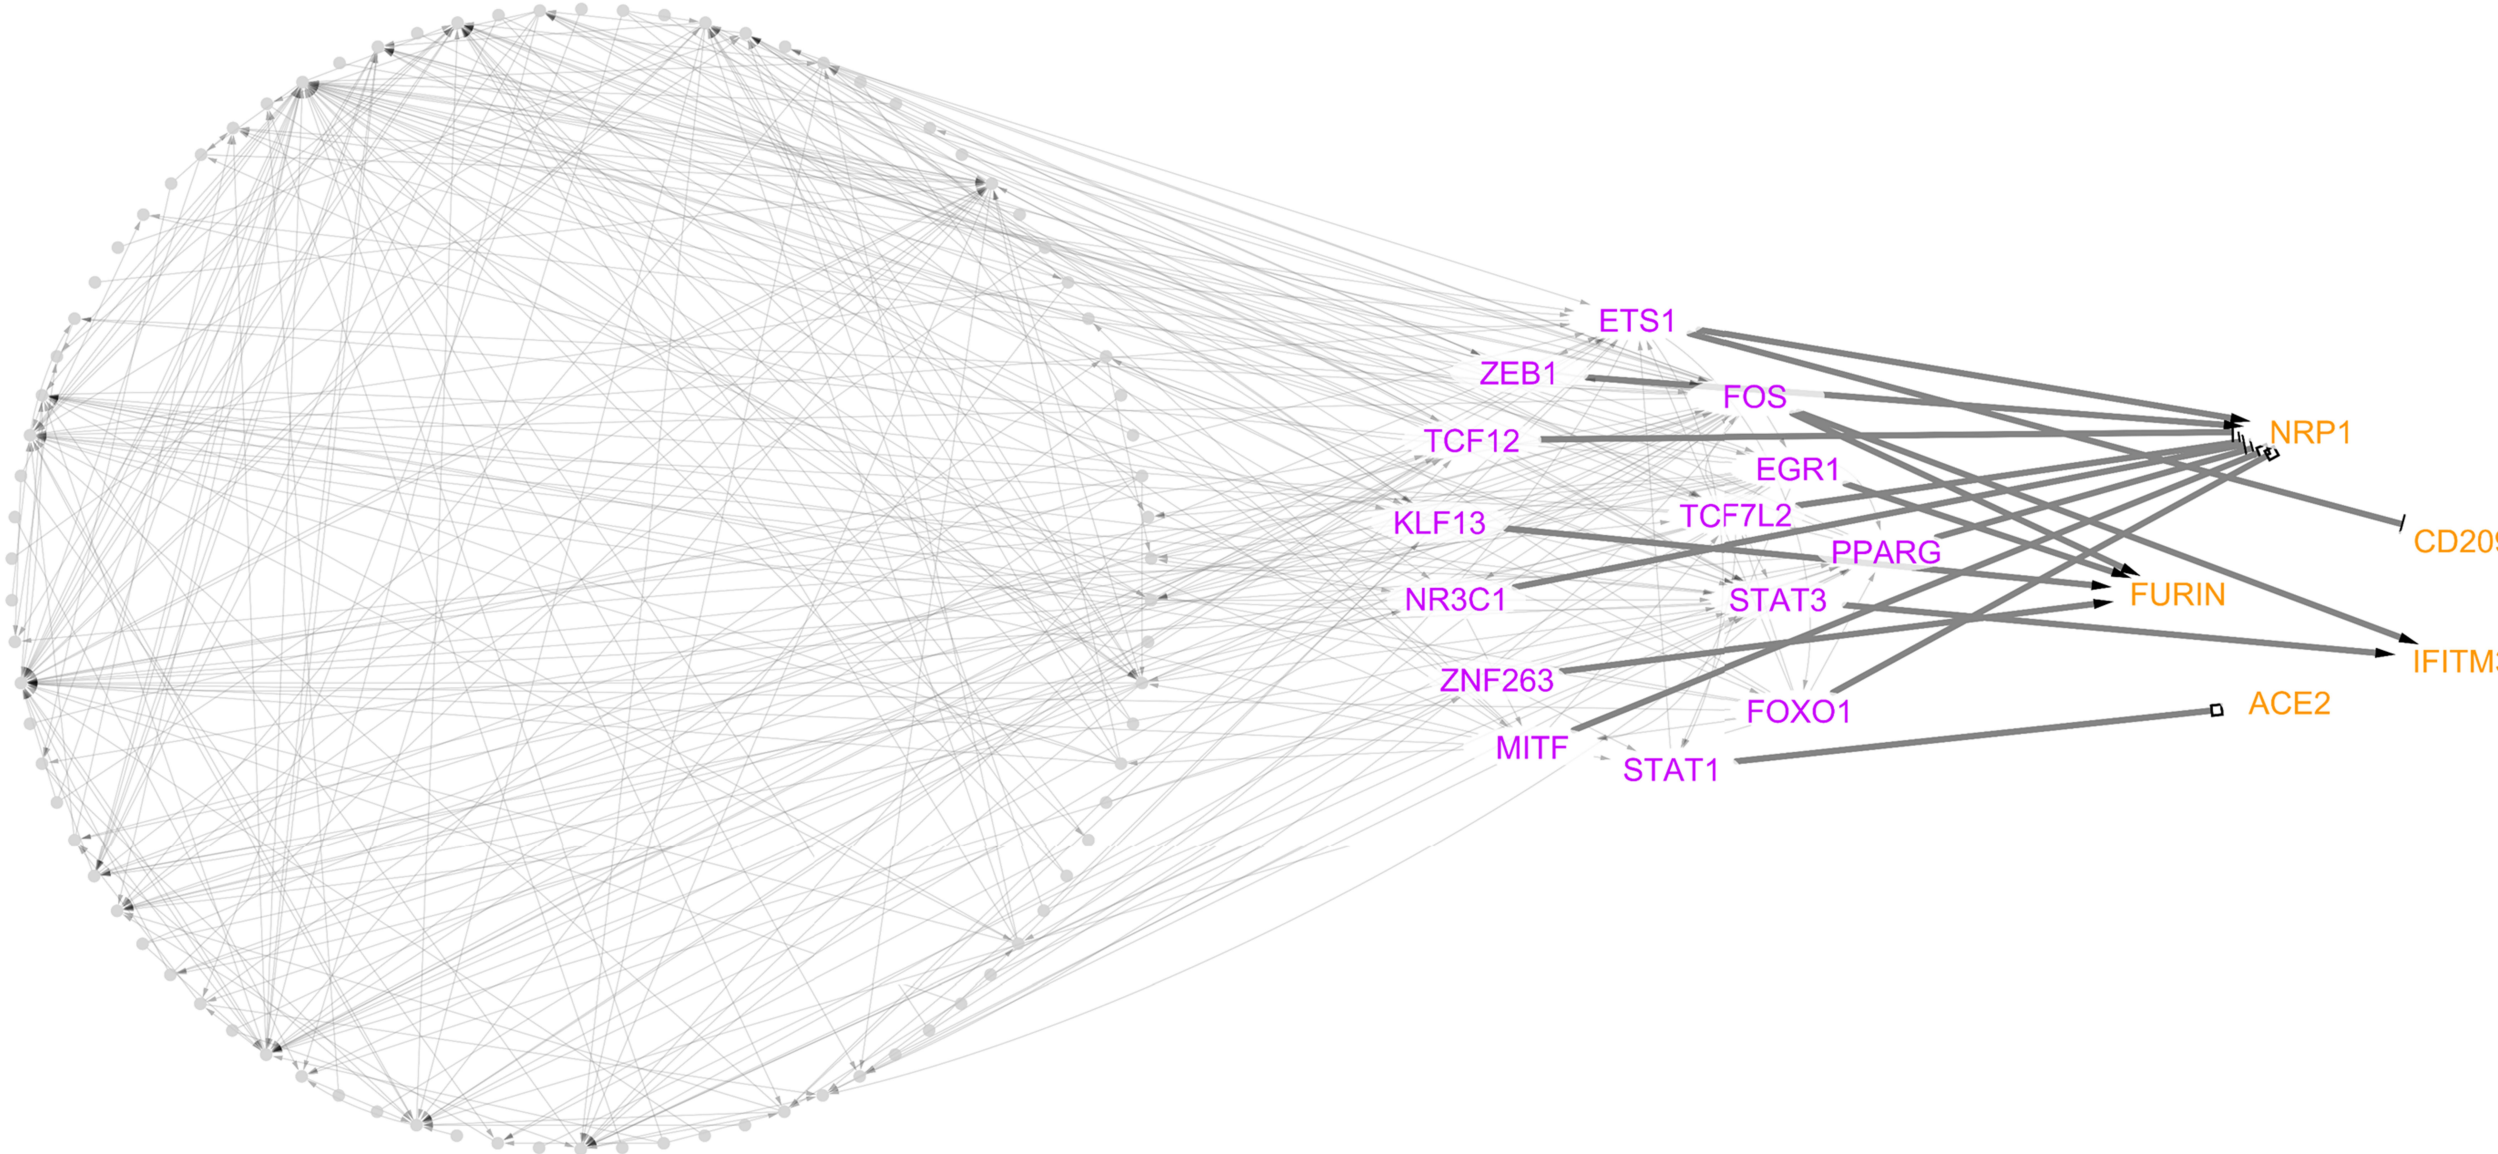

Supplement: s1 [file s1]

(a)

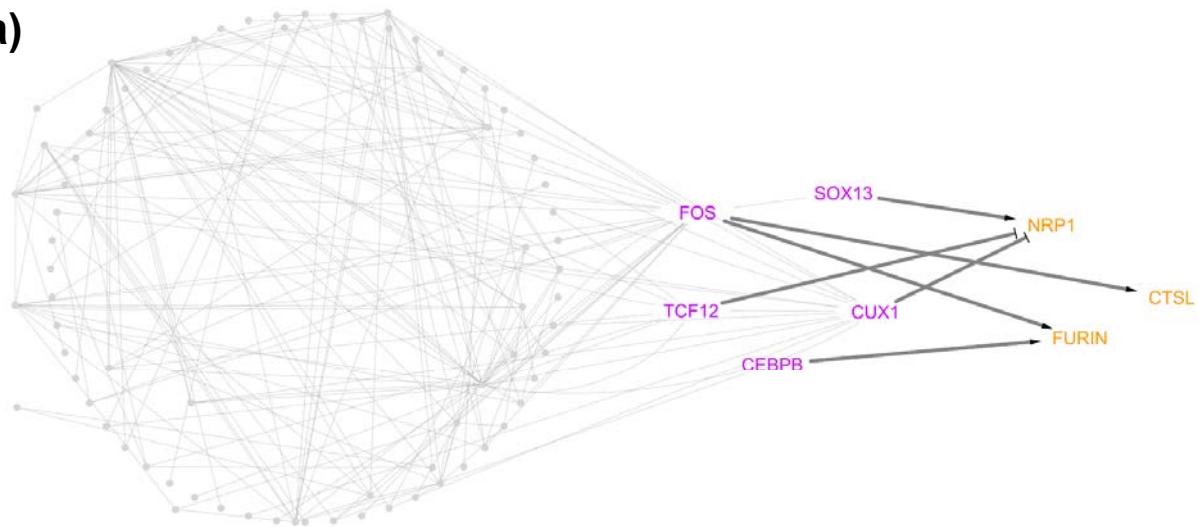

(b)

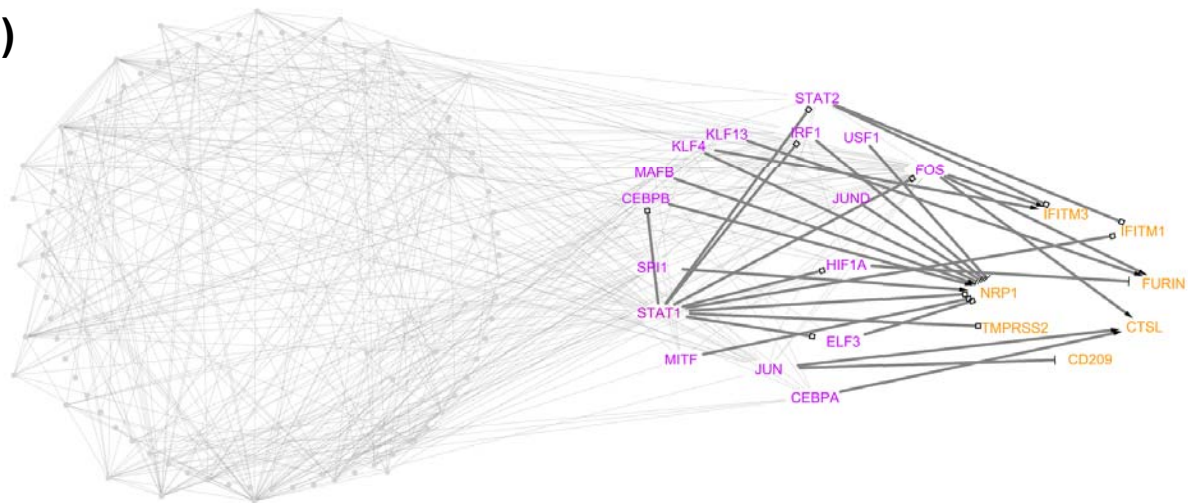

Supplement: s1 [file s1]

**(a)**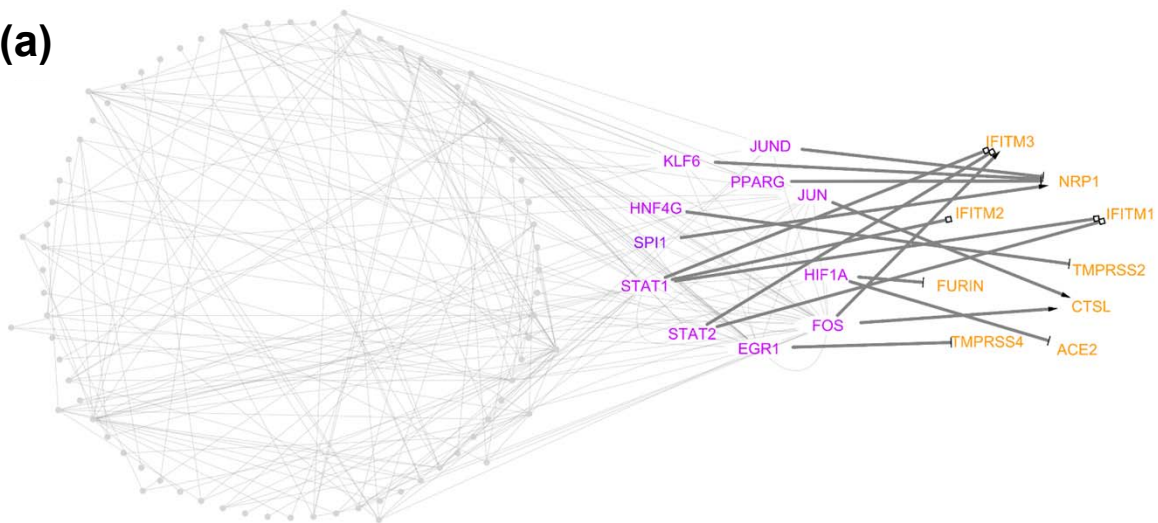**(b)**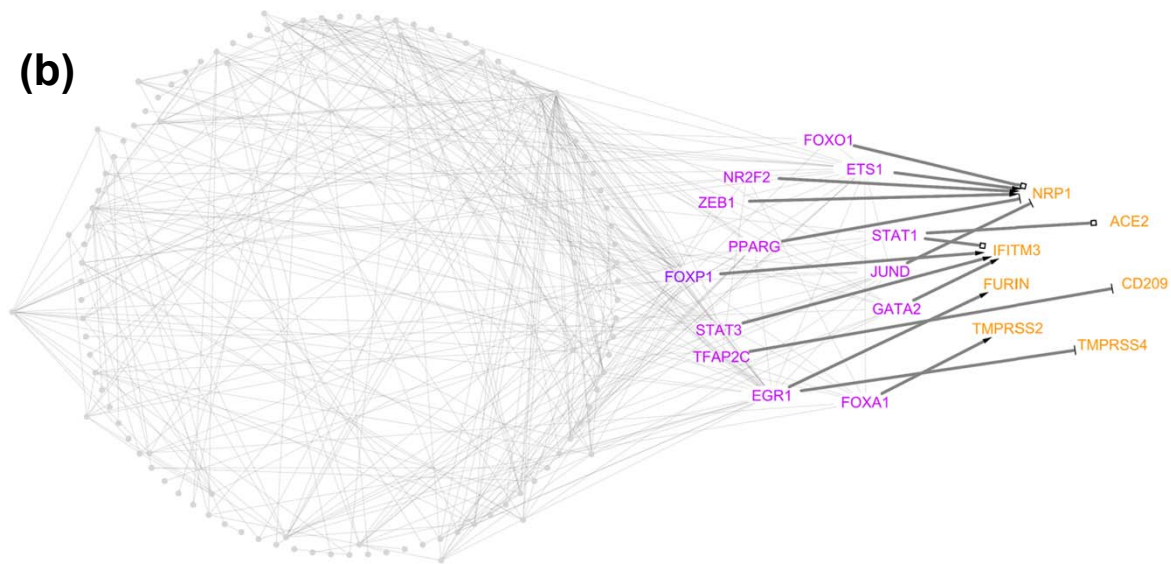

Supplement: s1 [file s1]

**(a)**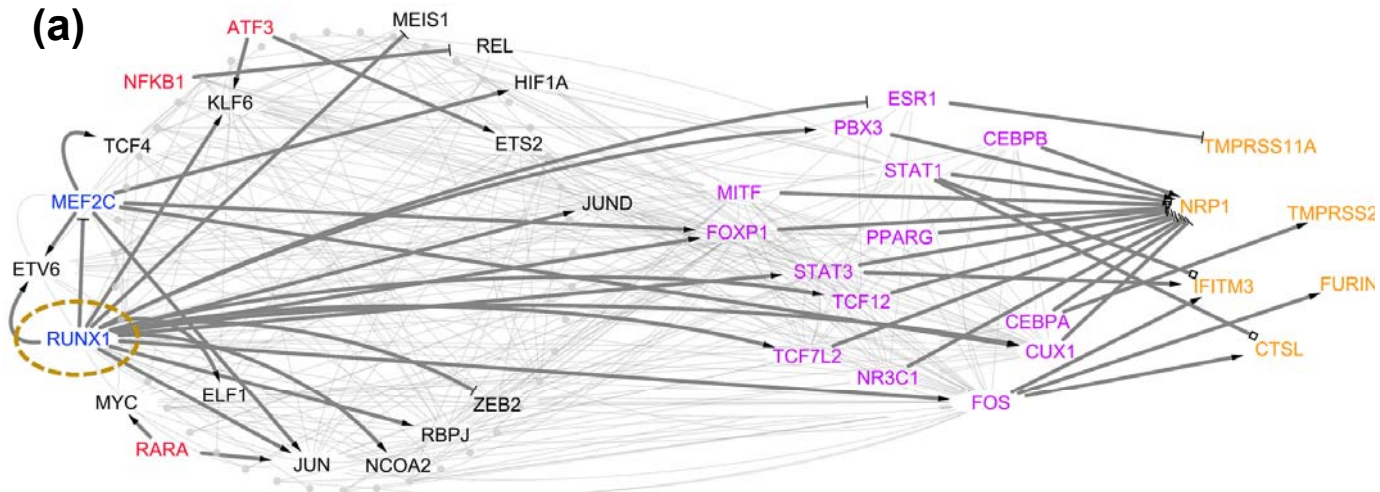**(b)**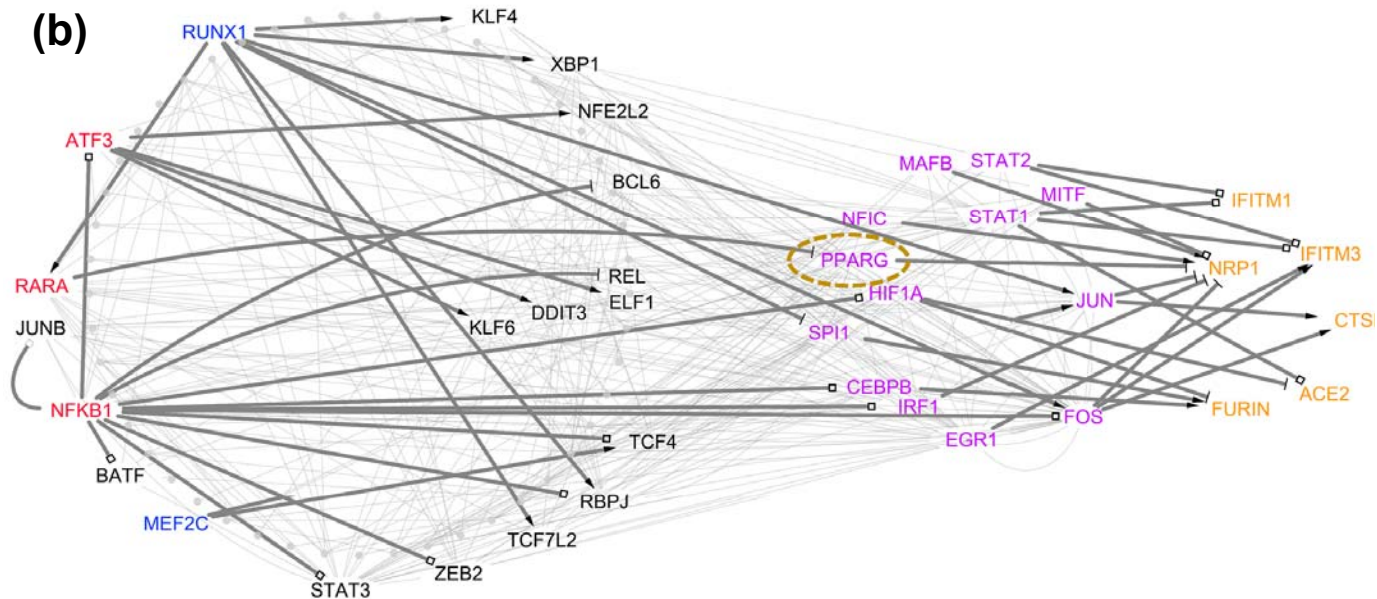

Supplement: s1 [file s1]

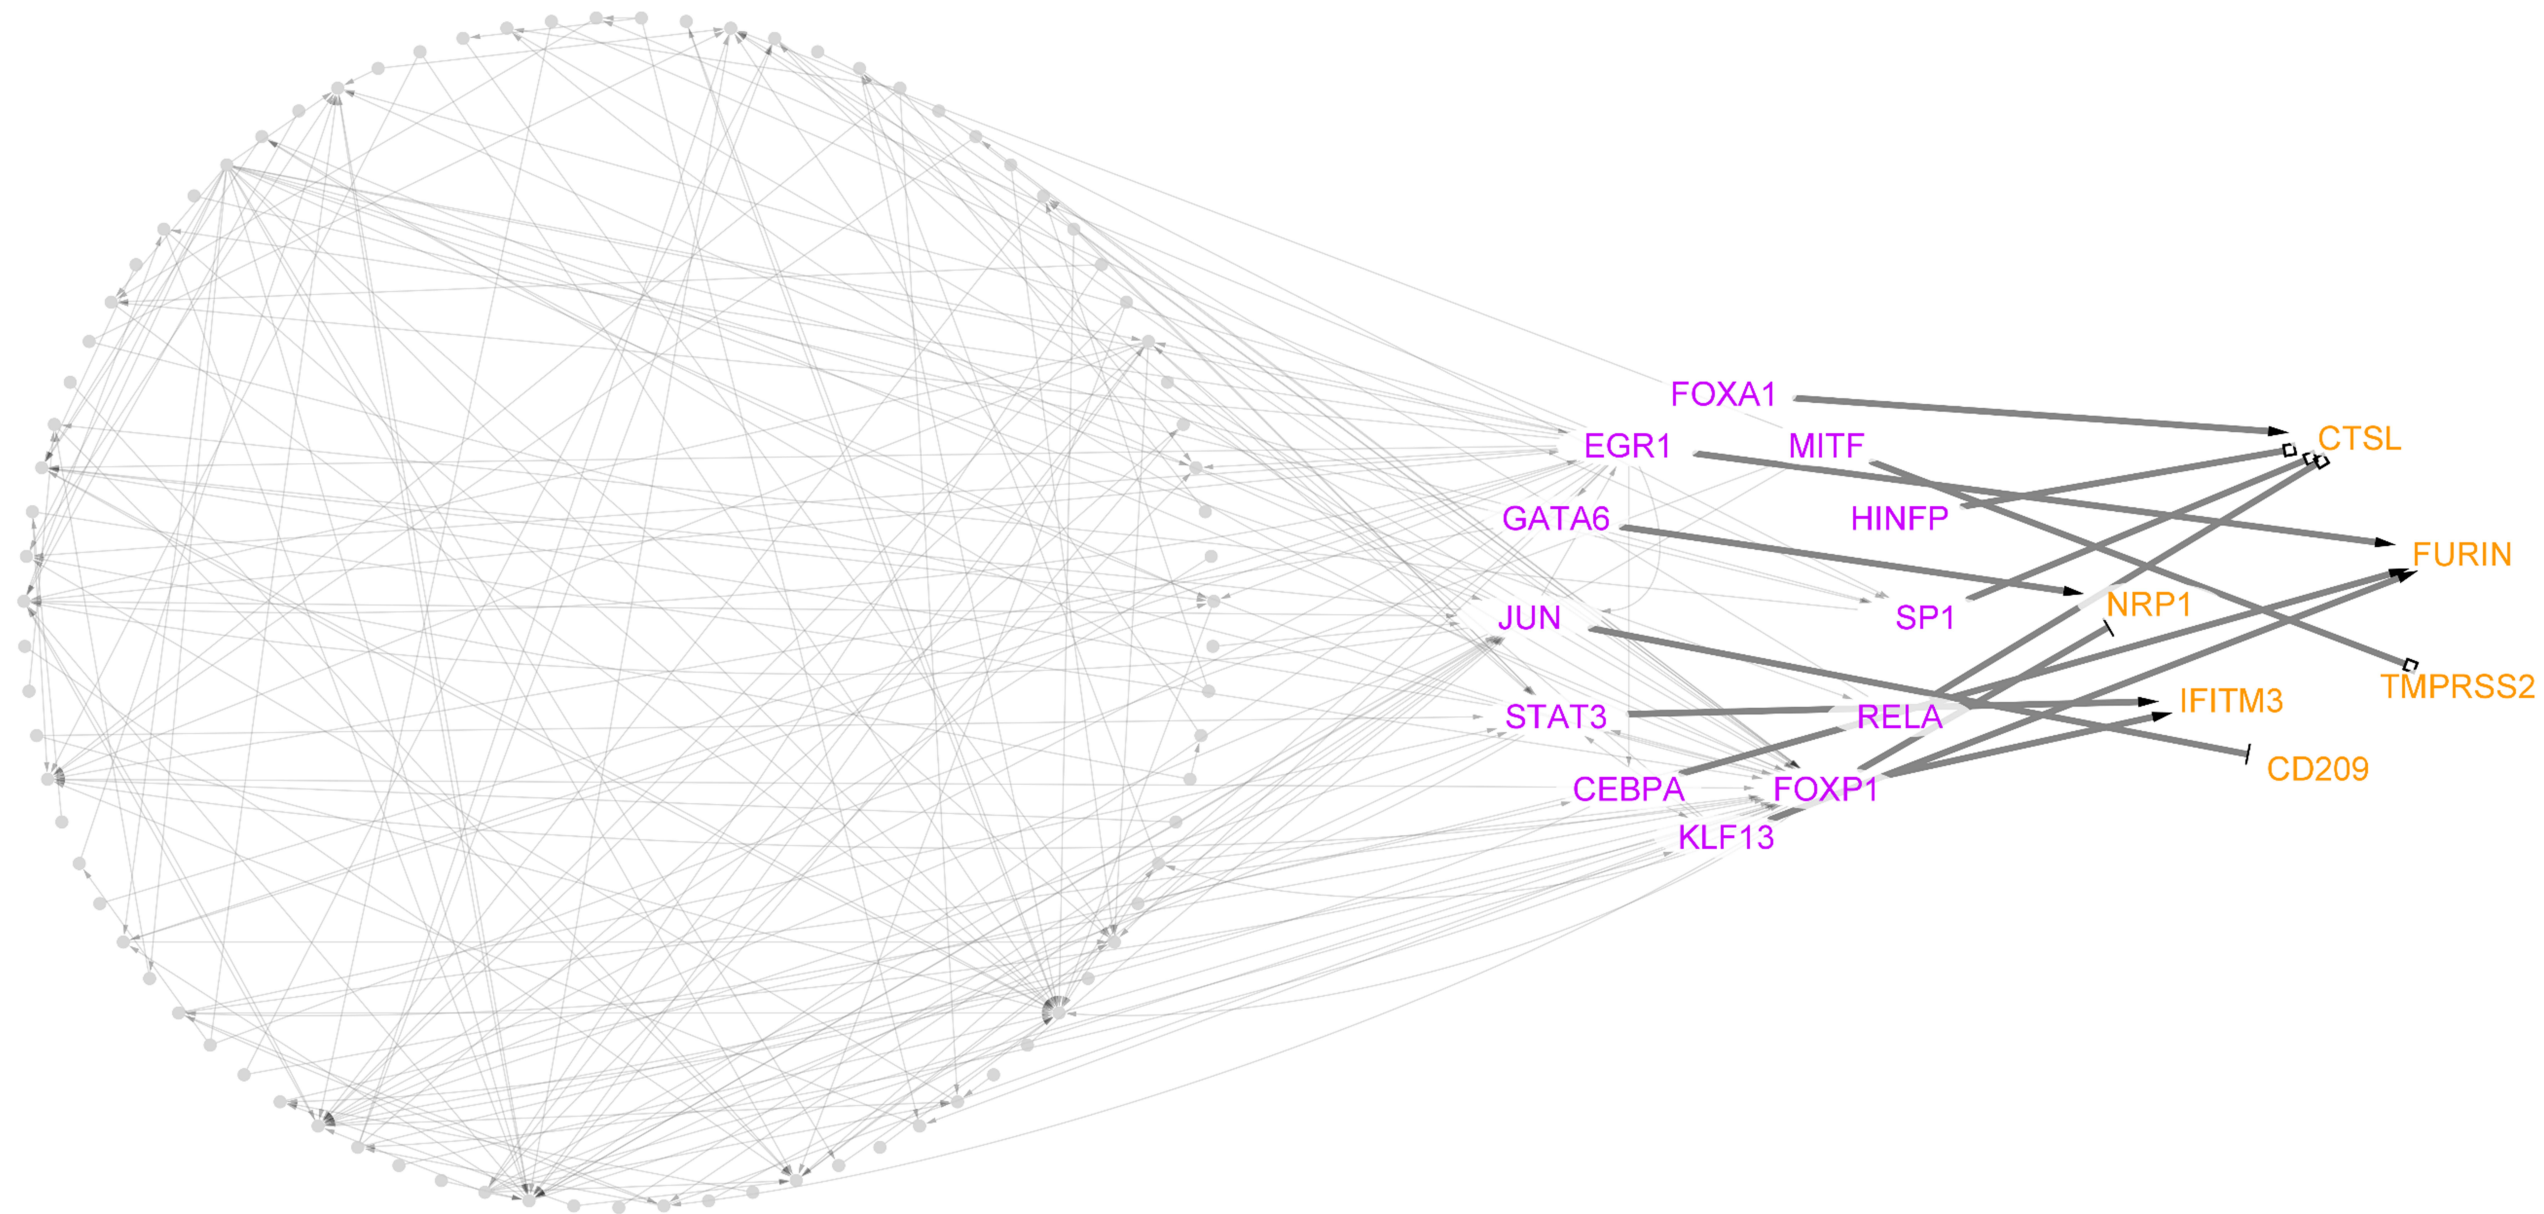

Supplement: s1 [file s1]

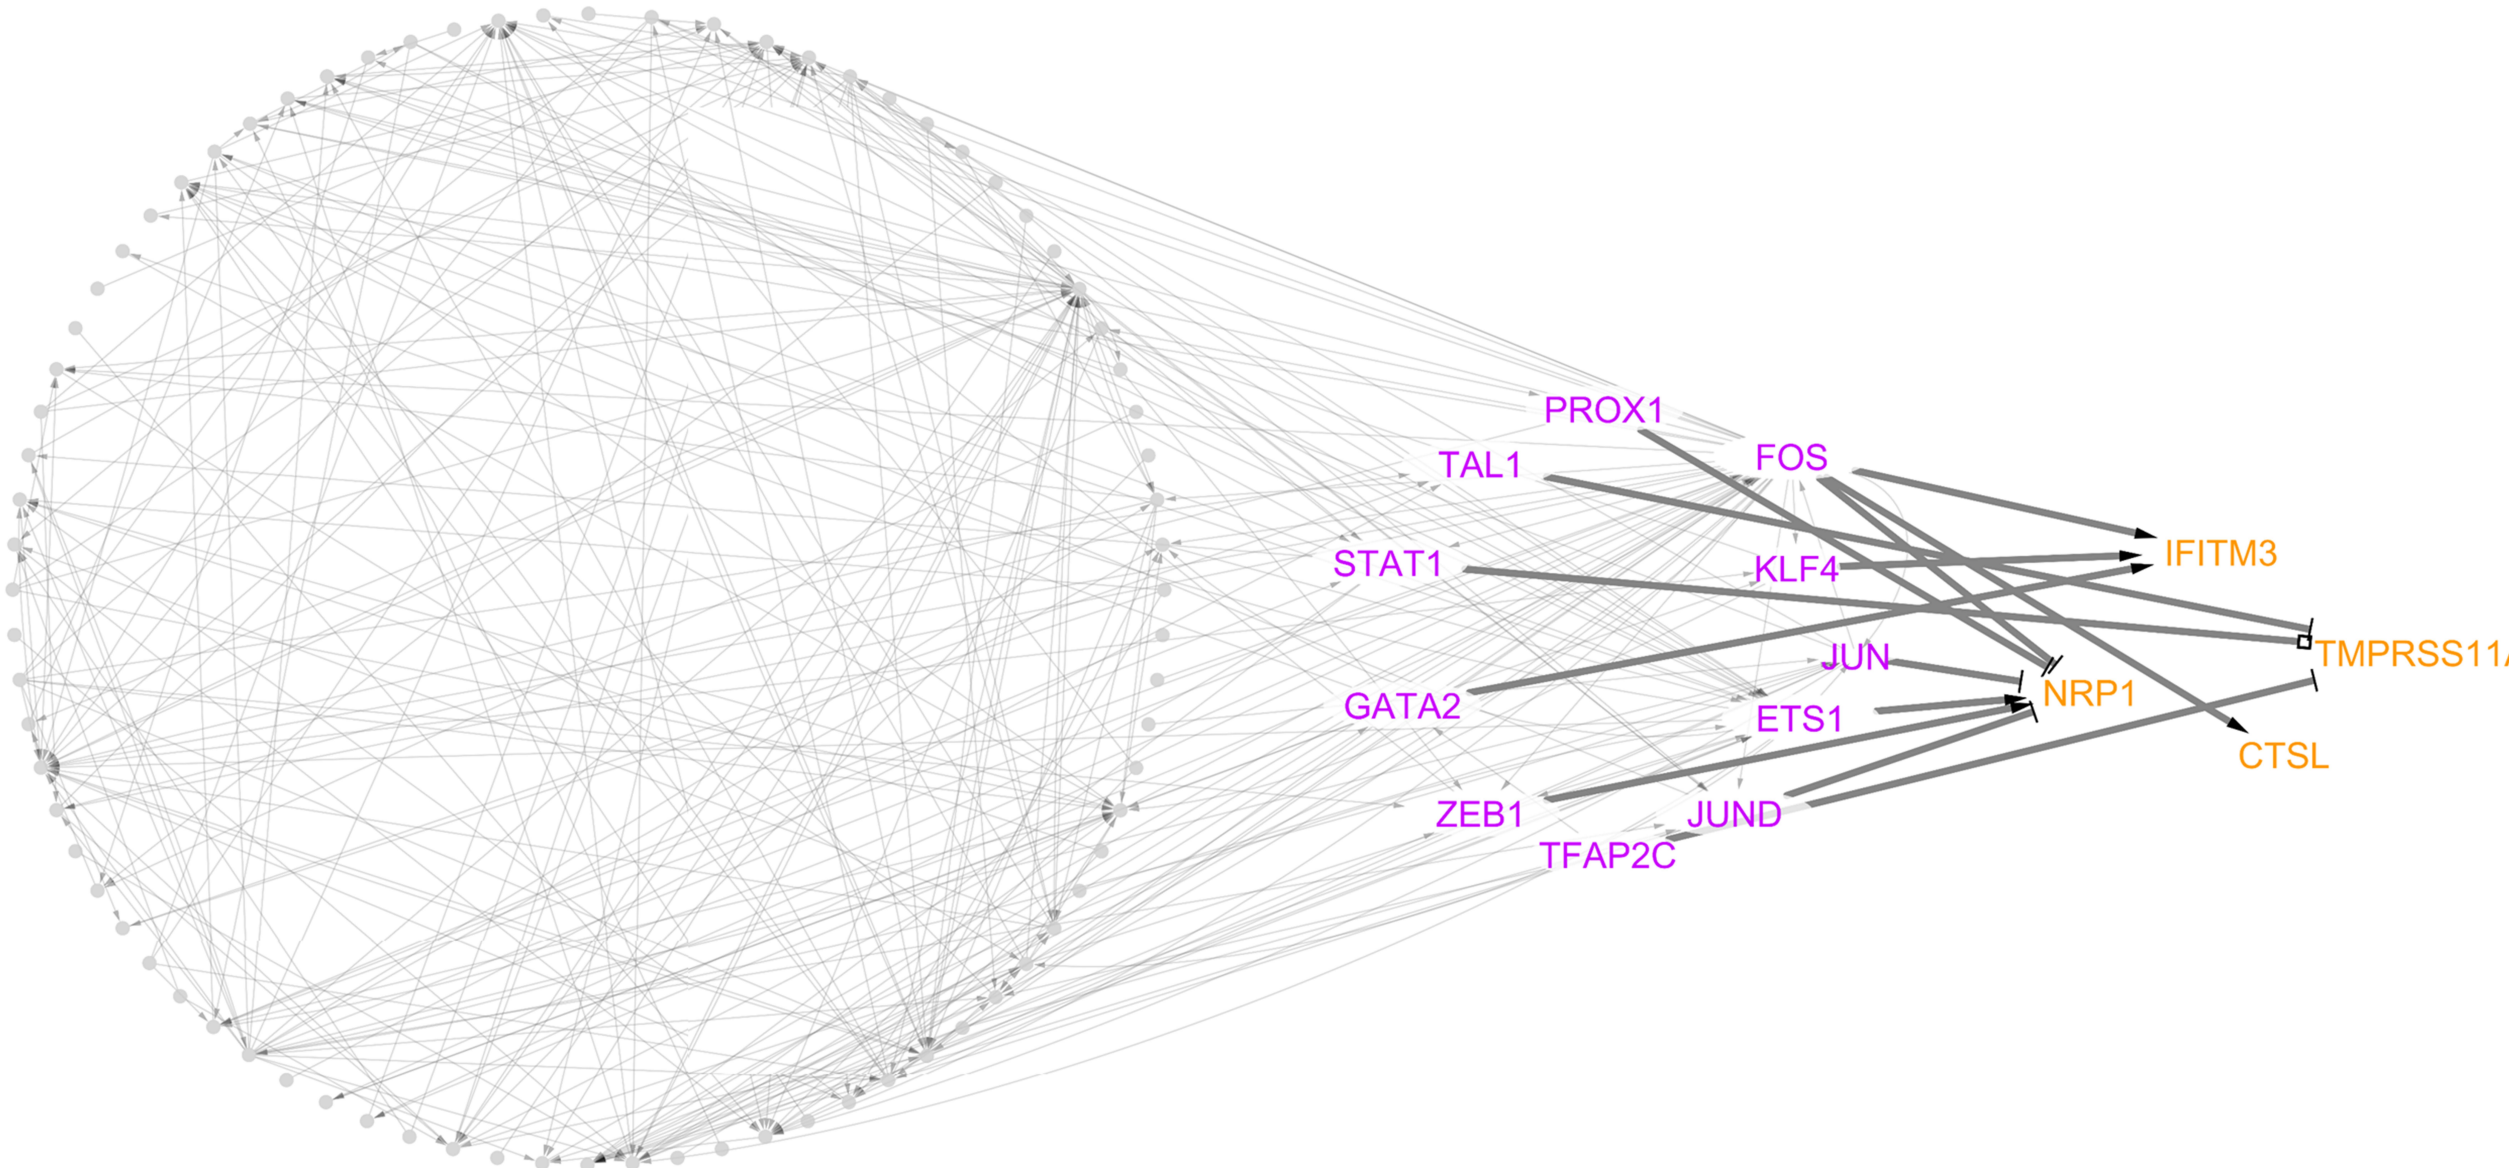

Supplement: s1 [file s1]
